# Supplementary material for: Phylogenetic Diversity of Lhr Proteins and Biochemical Activities of the Thermococcales aLhr2 DNA/RNA Helicase
Source: MDPI journal article supplement (doi:10.3390/biom11070950), 2021-06-26
Supplement: s1 [file s1]

**Phylogenomic diversity of Lhr-proteins and biochemical activities of the Thermococcales  
aLhr2 DNA/RNA helicase**

*Hajj et al*

**Supplementary Material (Figures & Tables)**

**Supplementary Figures**

**Taxonomy**

- Bacteria
- Archaea
- Asgard-archaea

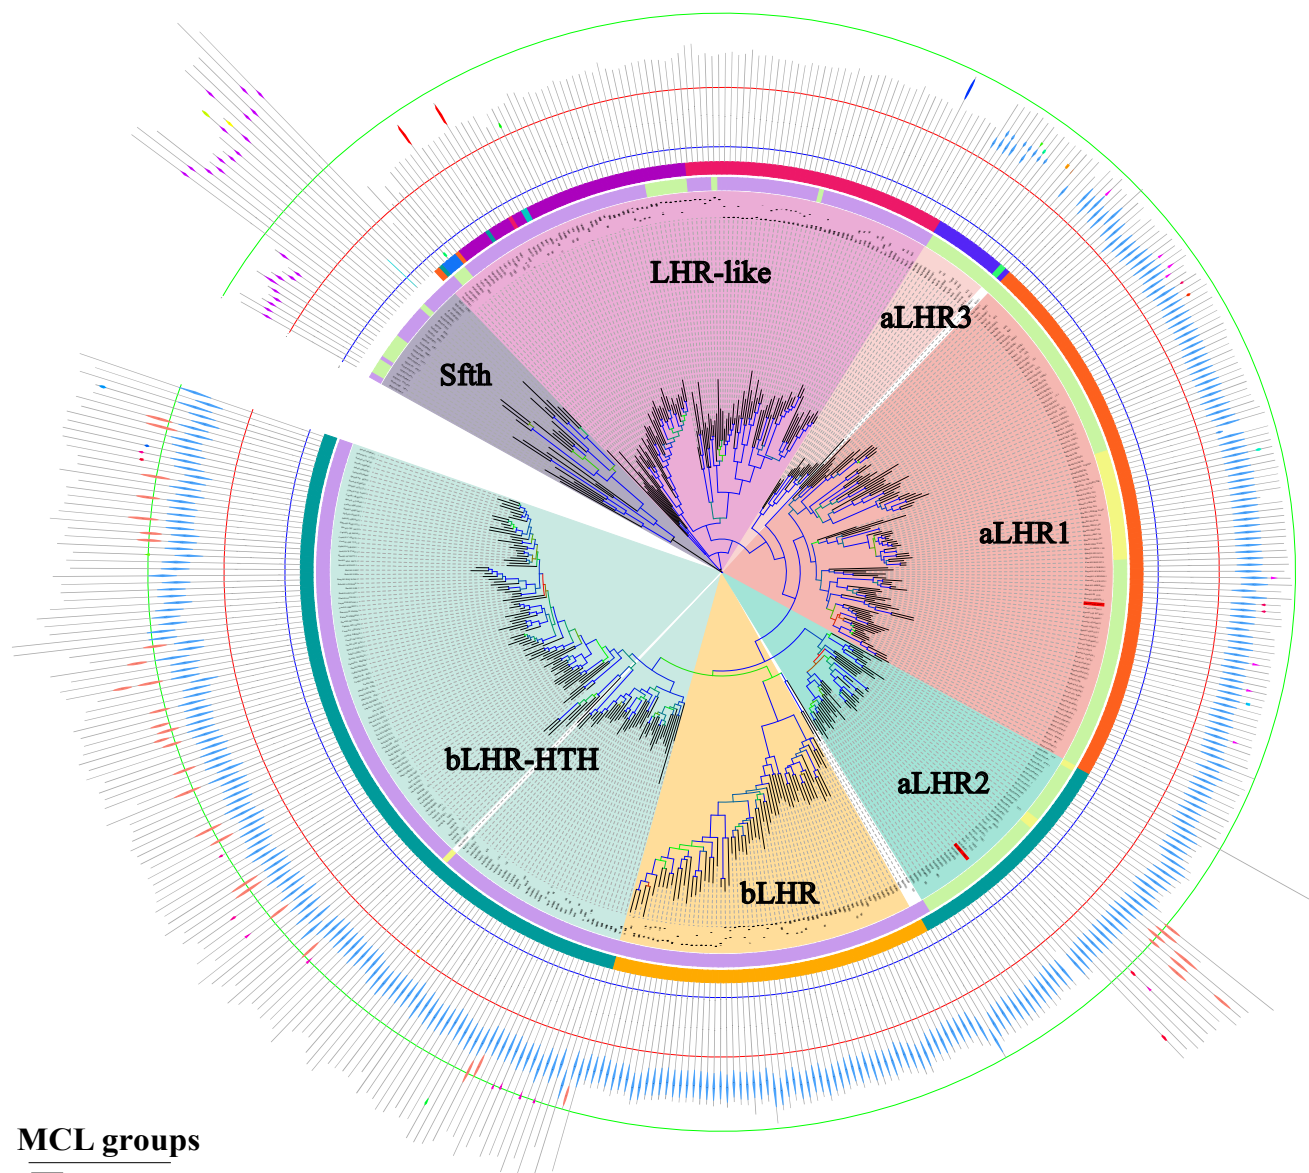**MCL groups**

- 1
- 2
- 3
- 4
- 5
- 6
- 7
- 8
- 9

**Pfam domains**

- Helicase\_C (PF00270)
- DEAD (PF00270)
- DEAD\_assoc (PF08494)
- HTH\_42

**Figure S1:** Phylogenetic tree of Lhr sequences rooted with SftH representative proteins. The SftH helicases being the closest related family of Lhr helicases, 24 representative sequences have been used as outgroup to root the tree of the Lhr family sequences. Legend as in Figure 2.

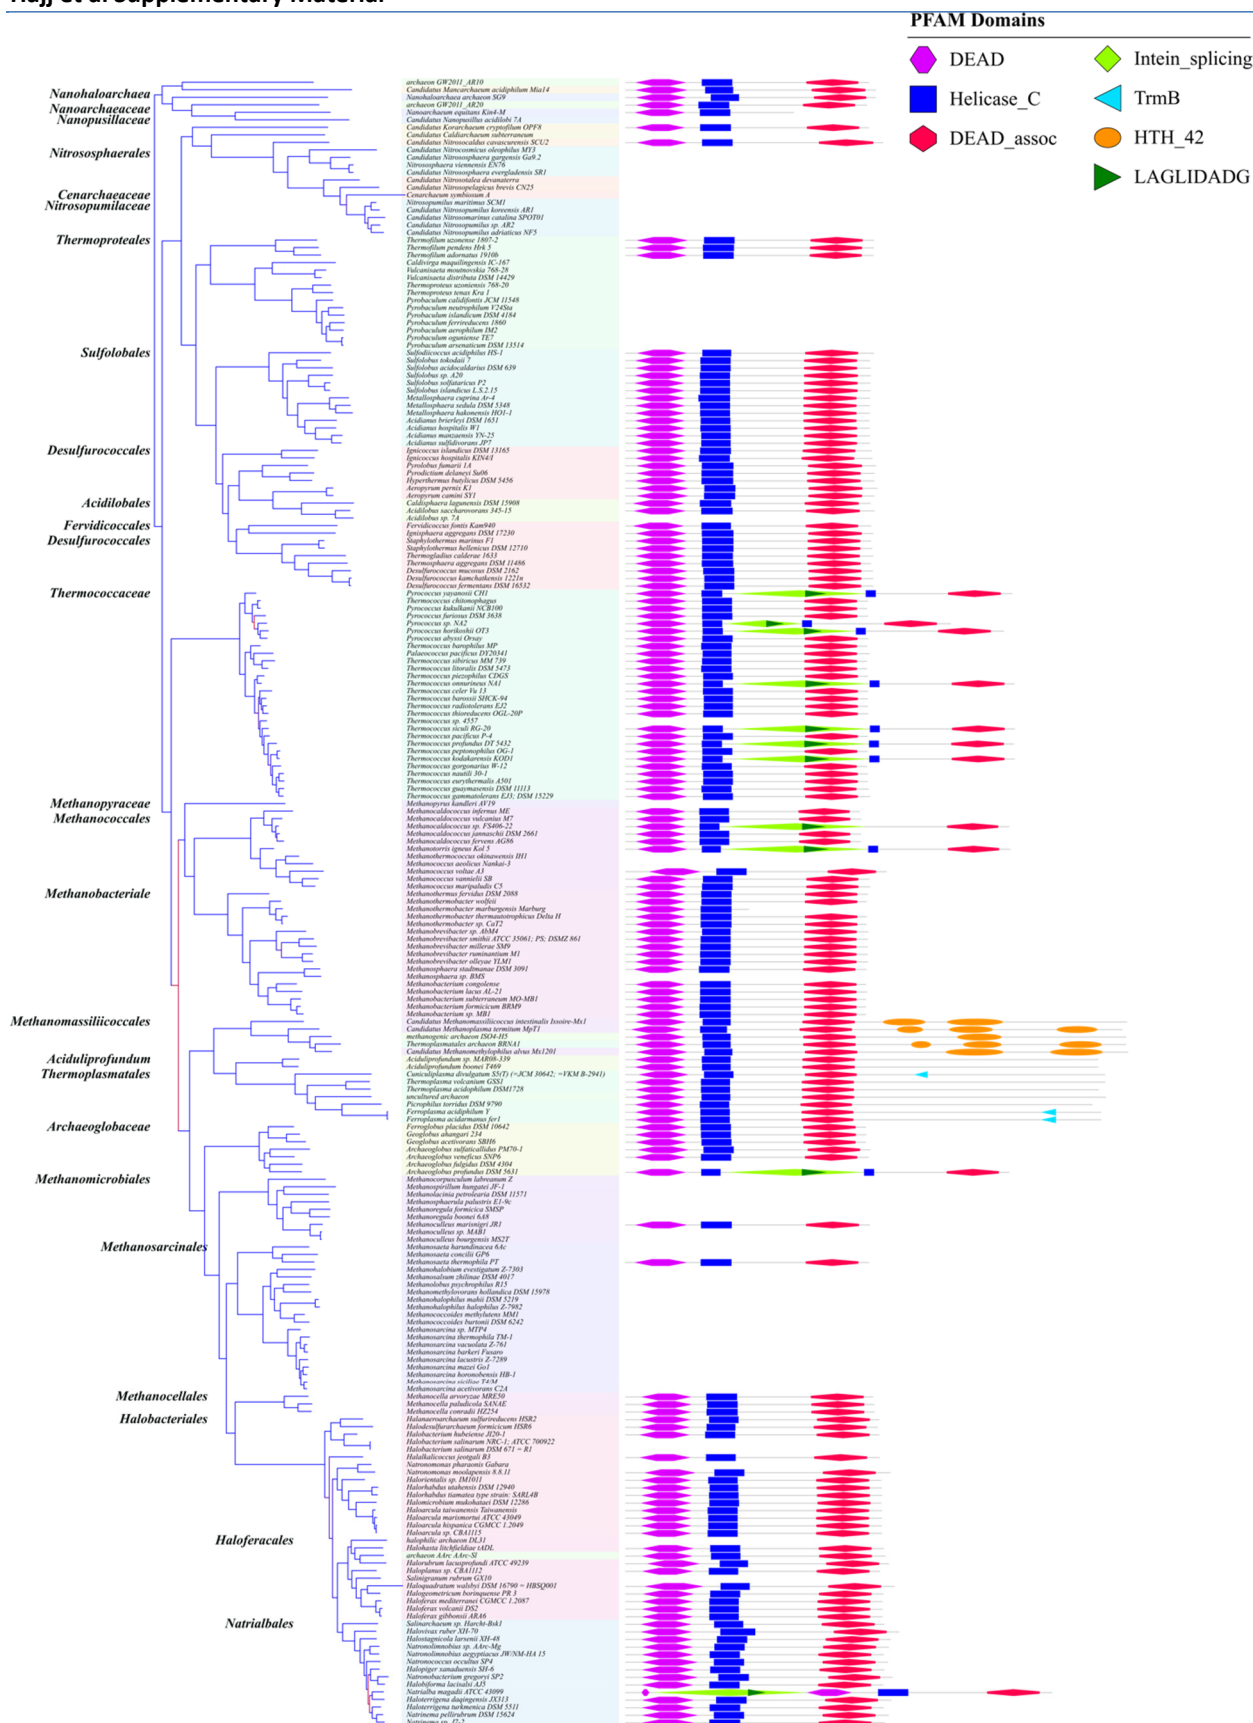

**Figure S2:** Domain architecture of aLhr2 proteins. Left panel: species tree of the Archaeal genomes as in Figure 3. NCBI taxonomy was reported at the order or family level. The right panel shows the motif architecture of the protein. Each protein is represented by a black line on which the Pfam domains have been mapped. The LAGLIDADG domain is integrated in the Intein\_splicing domain (see the legend for the domain colours). The figure was built with iTOL.

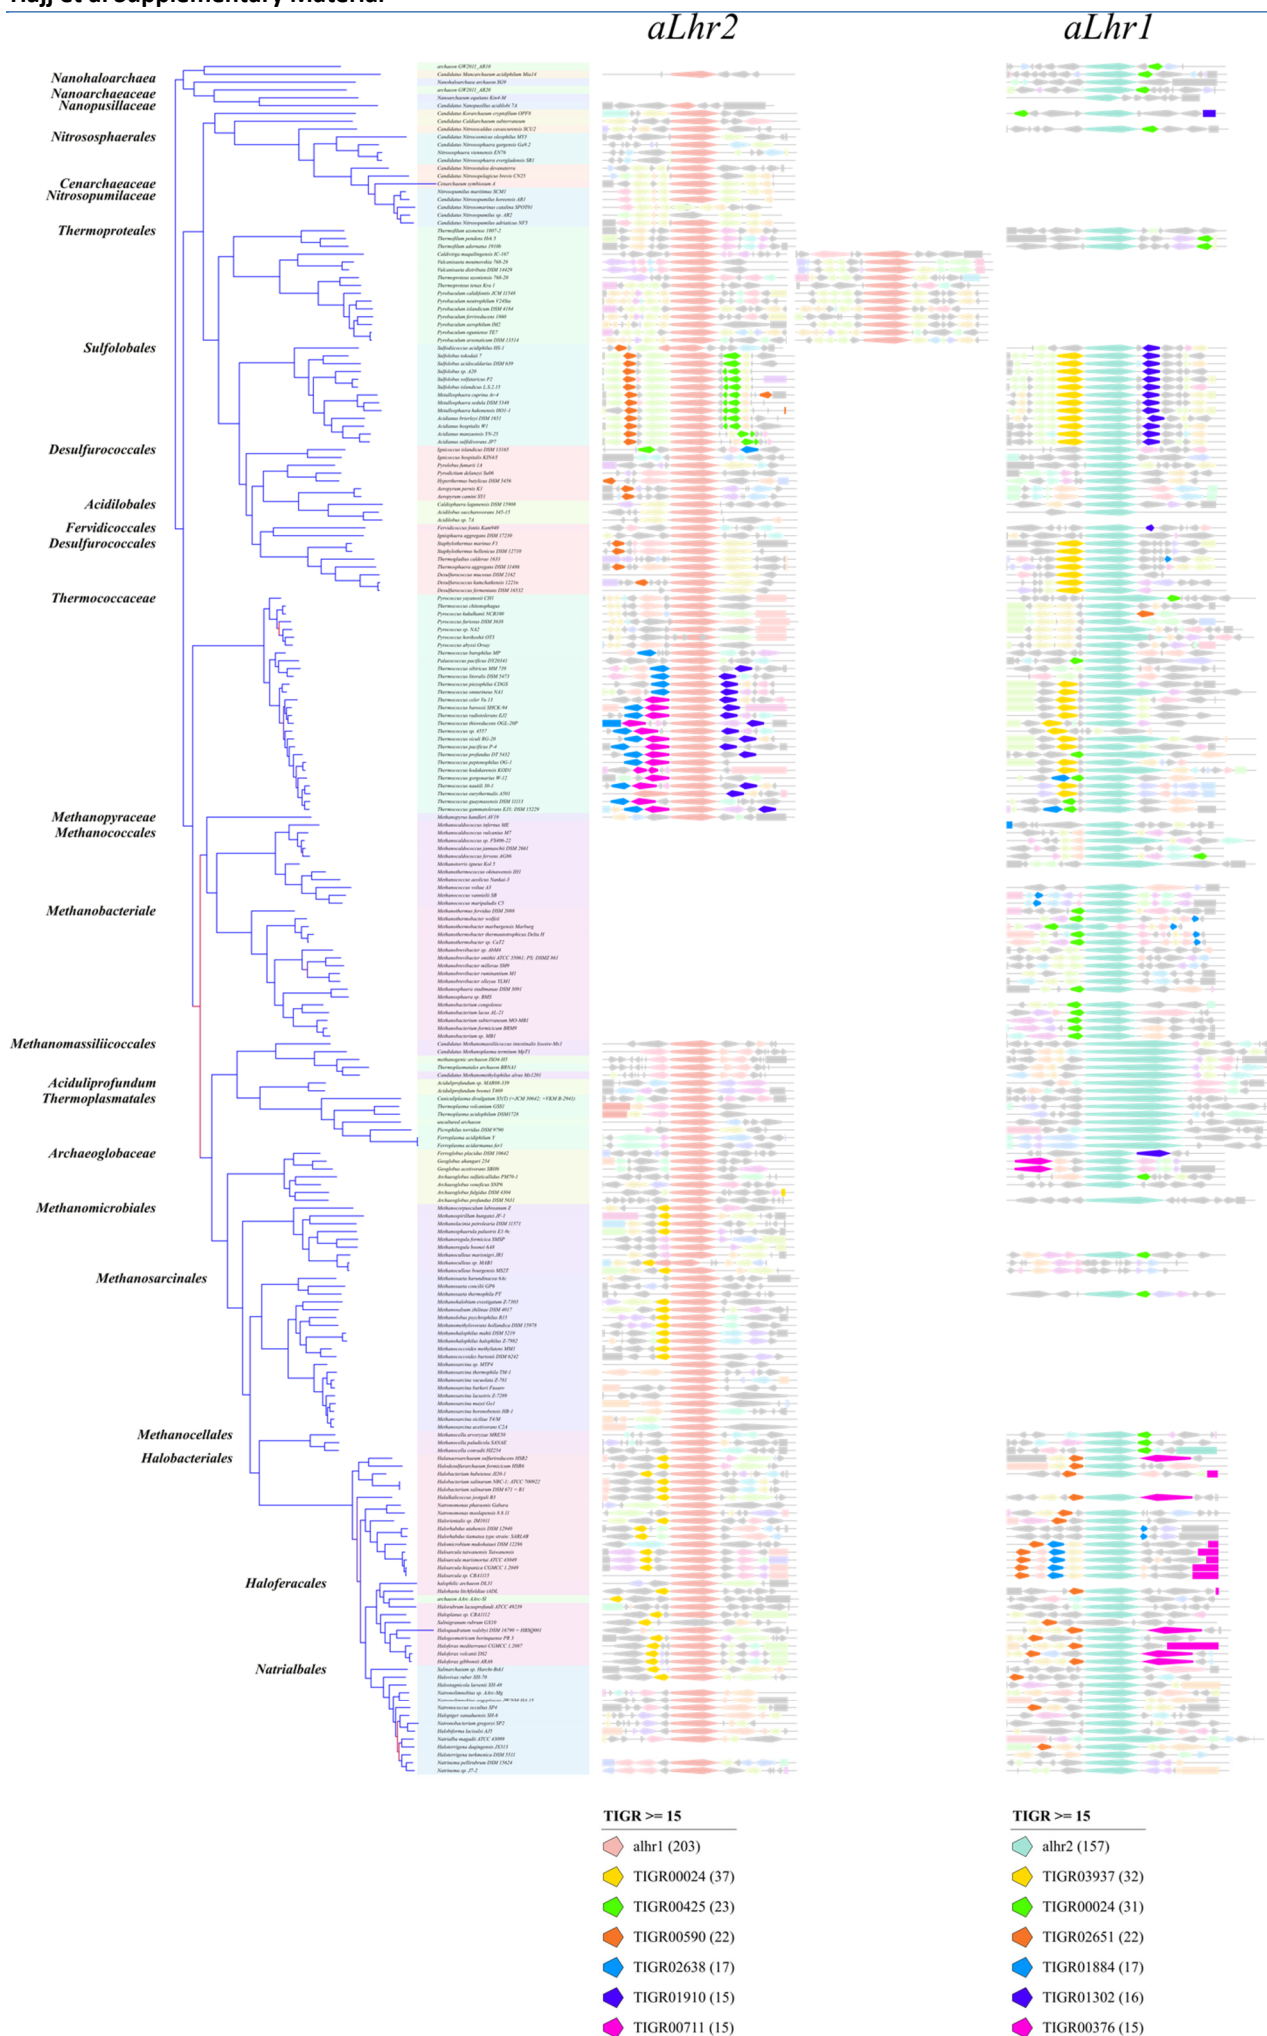

**Figure S3:** The neighbourhood of aLhr1 and aLhr2 encoding genes. Left panel: species tree of the Archaeal genomes as in Figure 3. For the two panels, the annotation of the genes located at 4000 bp upstream and downstream of the reference gene (*alrh1* or *alhr2*) was extracted. Genes with one end outside these boundaries are represented by rectangles. The genes are stained according to the TIGR annotation. TIGR annotations with occurrences greater than or equal to 15 are flagged with a flashy color (color code at the bottom of each gene context) and low frequency occurrences are colored with very light pastel colors to highlight conservation limited to closely related species. *alhr1* genes have not been annotated in *Candidatus Nitrosopumilus* sp. AR2, *Candidatus Nitrosomarinus catalina* SPOT01 and *Salinigranum rubrum* GX10 and *alhr2* gene has not been annotated in *Salinigranum rubrum* GX10. Gene fissions are present in *Methanoculleus* sp. MAB1 (*aLhr1*) and in *Methanothermobacter thermautotrophicus* Delta H (*aLhr2*). Three gene contexts have been conserved but without the *alhr2* gene in *Thermococcus* sp. 4557, *Methanoculleus* sp. MAB1 and *Methanoculleus bourgensis* MS2T. The figure was built with iTOL.



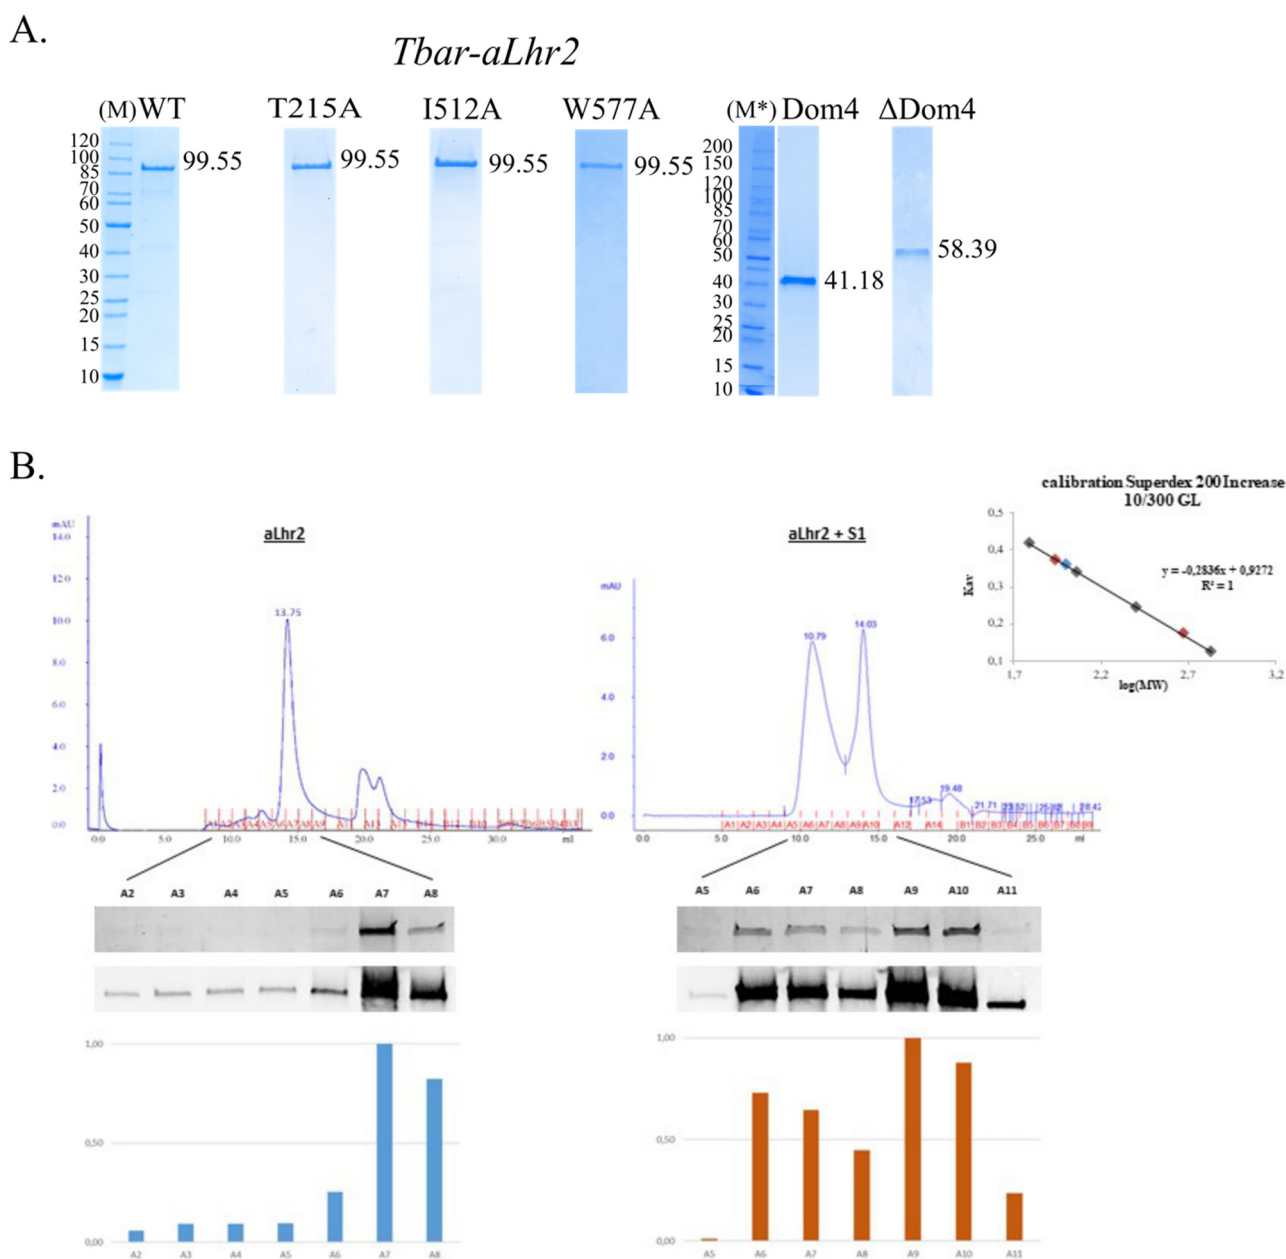

**Figure S4:** Purification and oligomeric state of *Tbar-aLhr2*. **(A)** Recombinant proteins used in this study. Highly purified *Tbar-aLhr2* WT and variants obtained by two-step purification were separated by SDS-PAGE and visualized by Coomassie blue staining. The predicted molecular weight of each protein is indicated. **(B)** Left panel: Size exclusion chromatography (SEC) shows that in solution *Tbar-aLhr2* WT is a monomeric protein with a single peak at an elution volume ( $V_e$ ) of 13.75 mL that corresponds to an apparent molecular mass of 100.5 kDa. Right panel: SEC shows that, in presence of DNA<sub>50</sub> (S1), *Tbar-aLhr2* WT assembles as a multimer ( $V_e$  of 10.79 mL). Based on column calibration, the multimer seems to be constituted of 4 to 5 molecules of *Tbar-aLhr2*. For both panel, the SEC elution curves, the Coomassie blue SDS-PAGE and the Western blotting of *Tbar-aLhr2* are given. The relative quantifications of the anti-aLhr2 Western blot signals are plotted. The S200 increase 10/300 GL column was calibrated with Ferritin (440 kDa), Aldolase (158 kDa), Conalbumin (75 kDa) and Ovalbumin (43 kDa). The calibration curve is shown as the top of the right panel.

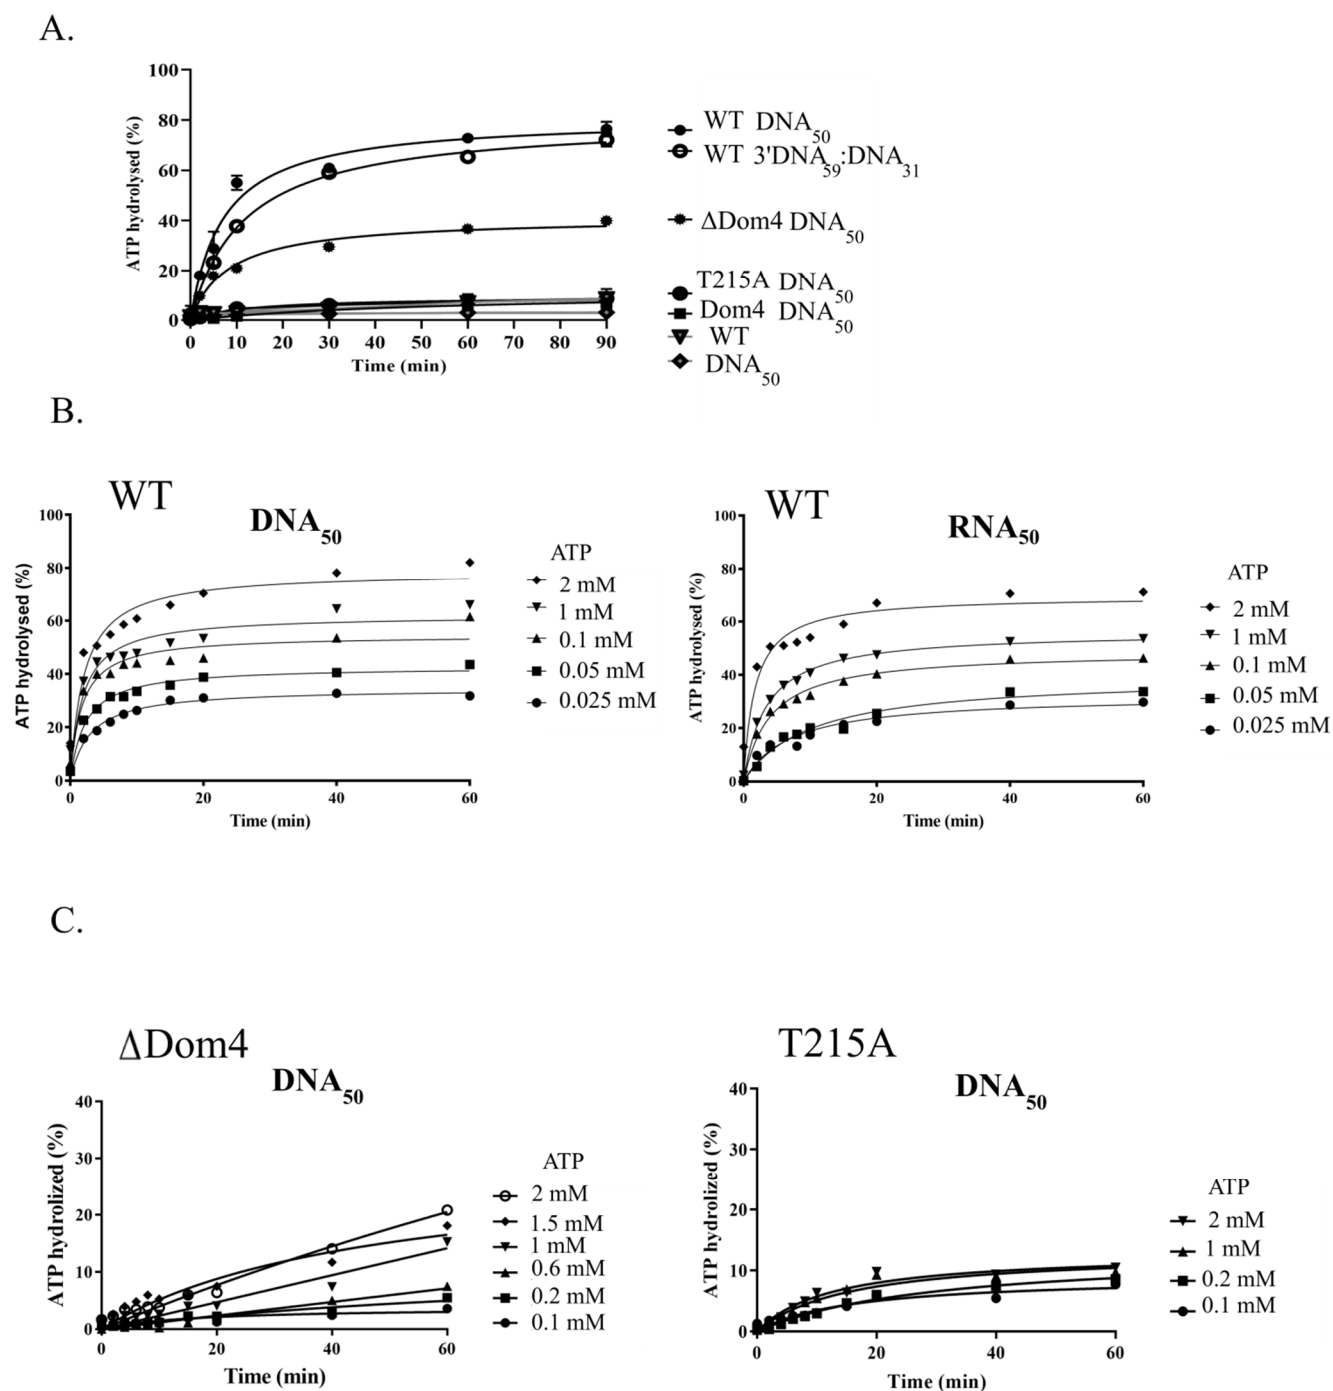

**Figure S5:** ATPase activity of WT and derivative *Tbar*-aLhr2. (A) ATPase activities of *Tbar*-aLhr2-WT, *Tbar*-aLhr2- $\Delta$ Dom4 and *Tbar*-aLhr2-Dom4 in the presence of DNA<sub>50</sub> or 3'DNA<sub>59</sub>:DNA<sub>31</sub>. Same controls as in Figure 5 with no protein (DNA<sub>50</sub>). (B) Kinetics of ATP hydrolysis as in (A) using a range of ATP concentration from 0.1mM to 2mM as indicated, in presence of single stranded nucleic acid DNA<sub>50</sub> (left panel) or RNA<sub>50</sub> (right panel) (C) ATPase activities of *Tbar*-aLhr2- $\Delta$ Dom4 and *Tbar*-aLhr2-T215A derivatives using a range of ATP as in (B), in presence of single stranded nucleic acid DNA<sub>50</sub>.

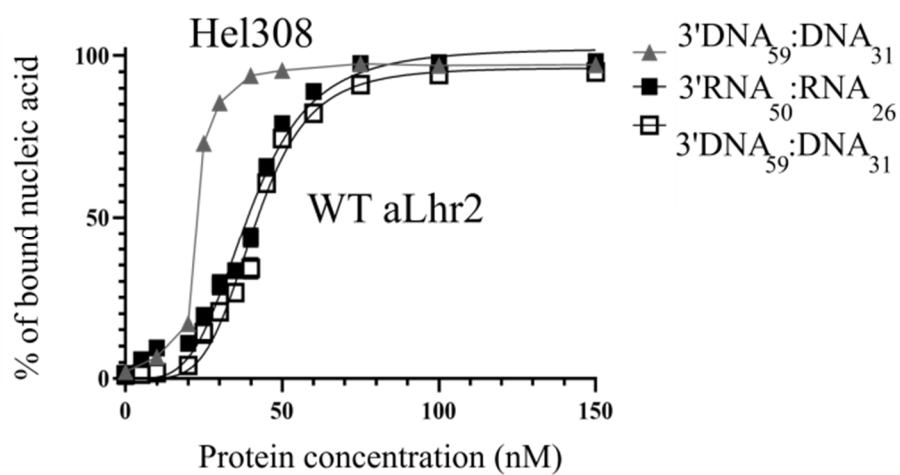

**Figure S6:** Binding affinity of *Tbar*-aLhr2 and *Paby*-Hel308 for 3'overhang DNA and RNA duplexes as indicated. Legend as in Figure 6.



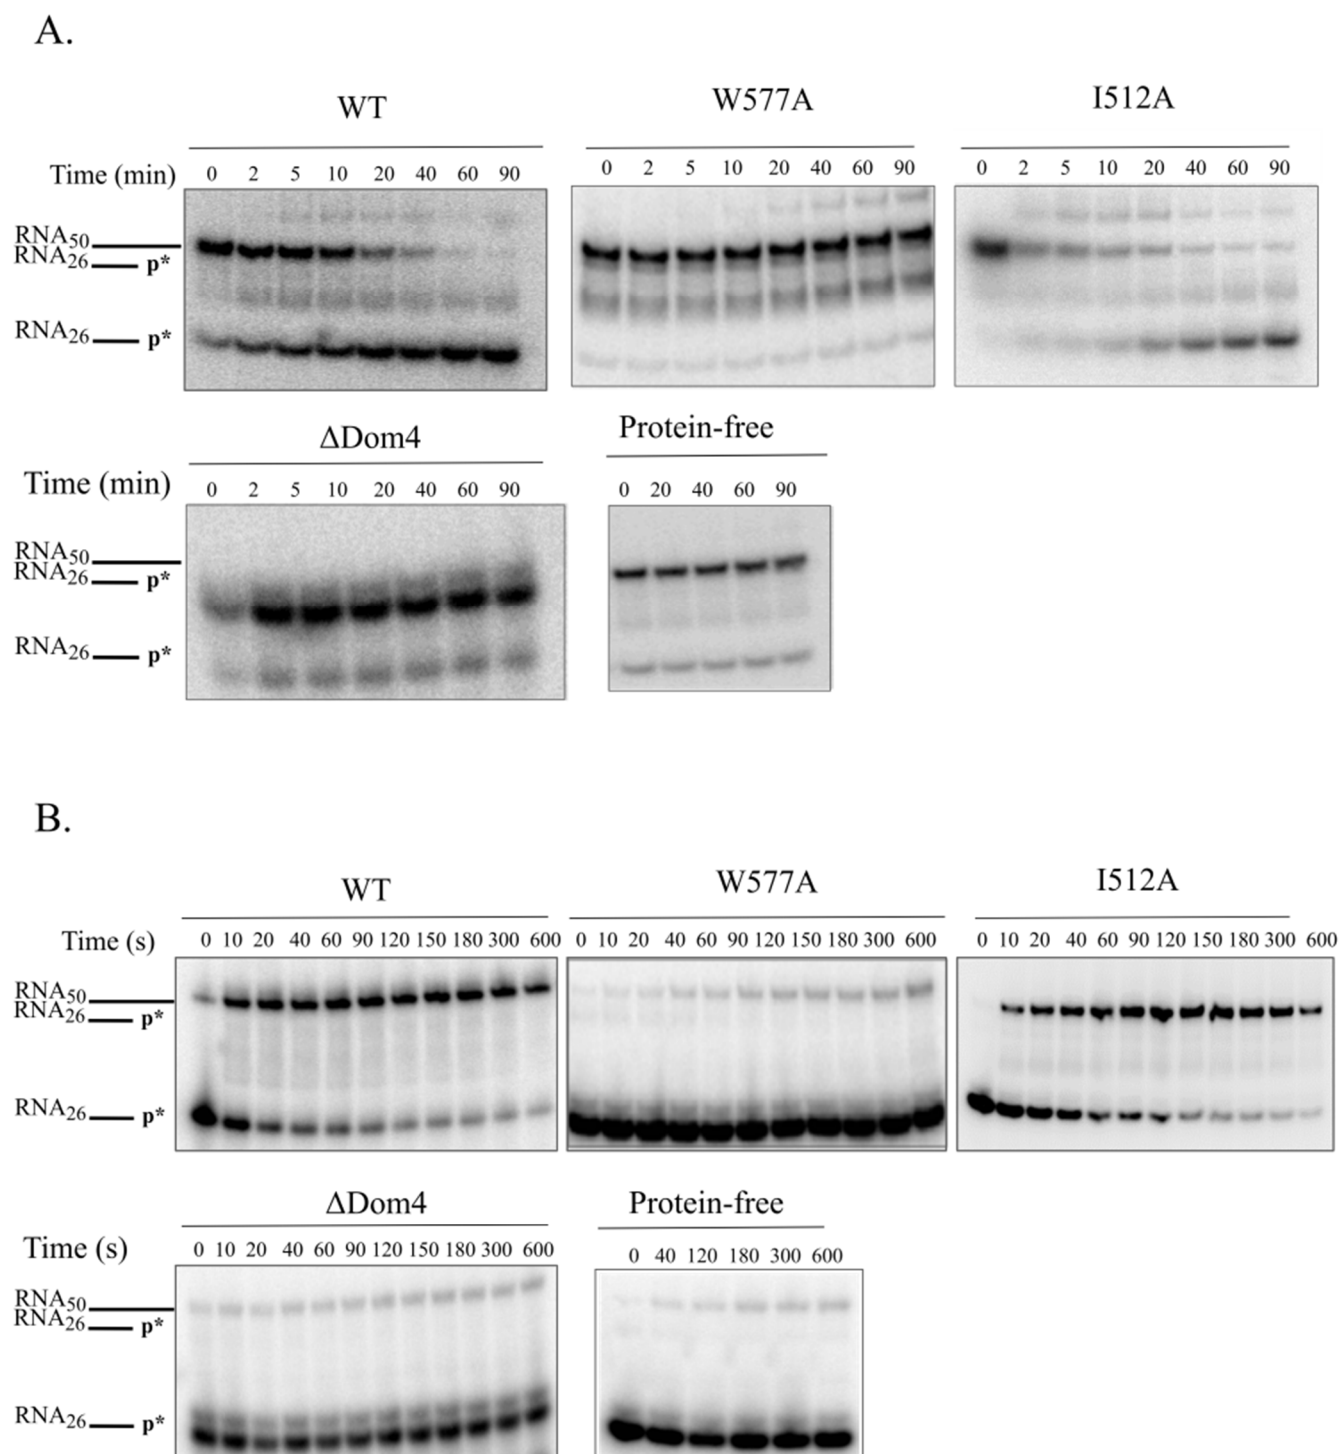

**Figure S7:** Wild type *Tbar*-aLhr2 and variants unwinding and annealing activities. **(A)** Unwinding activities: a pre-formed 3'DNA<sub>50</sub>:RNA<sub>26</sub> radiolabelled hetero-duplex was incubated for 0, 2, 5, 10, 20, 40, 60 and 90 min at 65°C with 5mM of ATP and 1μM oligoTrap in presence or absence of 250nM of *Tbar*-aLhr2WT. Reaction products without (protein-free) or with protein were separated on a native 8% acrylamide gel; **(B)** Annealing activities: the radiolabelled RNA<sub>26</sub> was incubated with the unlabelled 3'DNA<sub>50</sub> from 10, 20, 40, 60, 90, 120, 150, 180, 300 and 600 seconds at 65°C with or without 250nM of *Tbar*-aLhr2. Product reactions without protein (free-protein) or with protein were separated on a native 8% acrylamide gel;

A.

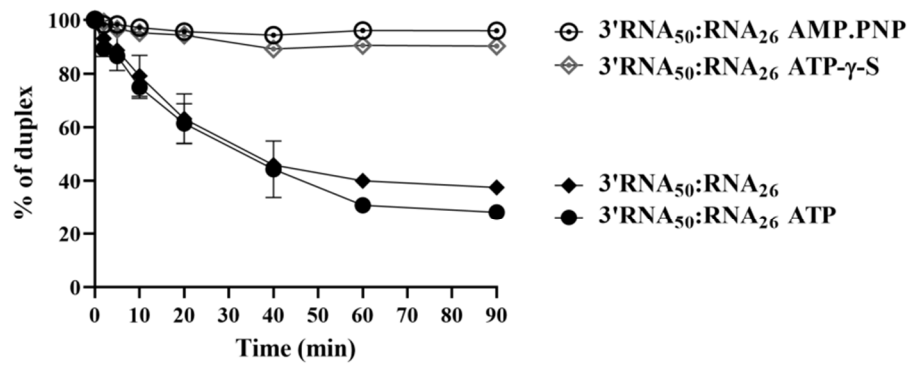

B.

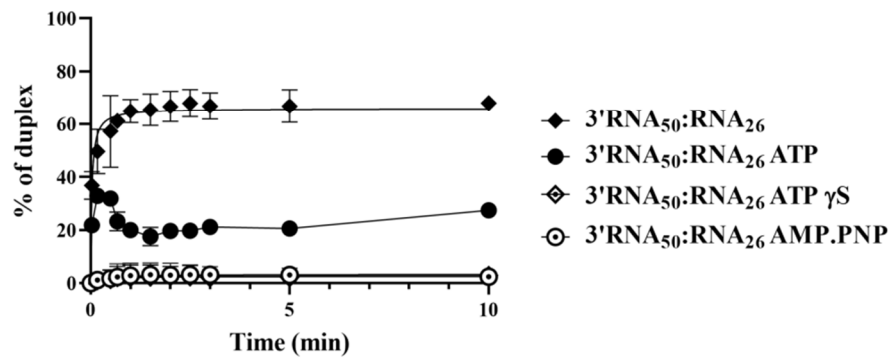

**Figure S8:** Unwinding and strand-annealing activities of *Tbar*-aLhr2WT in presence of ATP, AMP.PNP and ATPγS (ATP analogues). **(A)** Kinetics of strand dissociation of 3'RNA<sub>50</sub>:RNA<sub>26</sub> duplex; **(B)** Kinetics of strand annealing formation of 3'RNA<sub>50</sub>:RNA<sub>26</sub> duplex. Legend as in Figure 6 and 7, respectively.

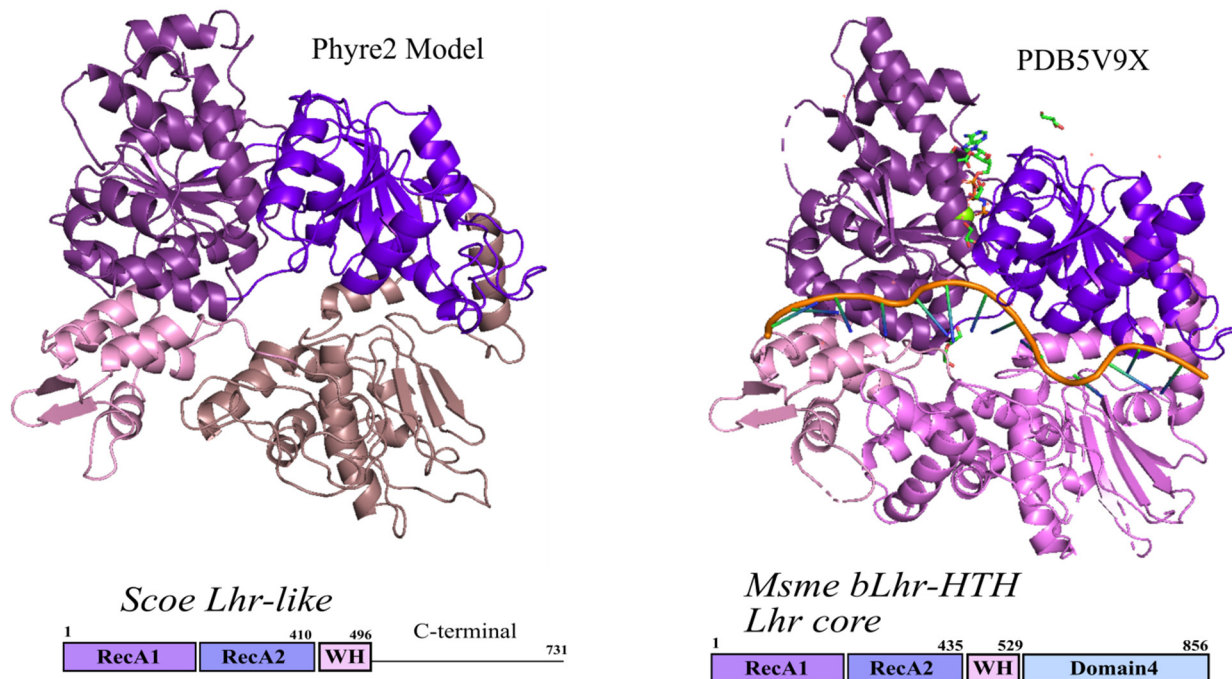

**Figure S9:** Structure models of *M. smegmatis* bLhr-HTH and *S. coelicolor* Lhr-like. The structure of the *M. smegmatis* Lhr-core (1-856) of bLhr-HTH (accession number - PDB5V9X) is shown on the right panel. A model of *S. coelicolor* Lhr-like (SCO6640), built using the Phyre2 server (<http://www.sbg.bio.ic.ac.uk/phyre2>), is shown on the left. The RecA1 domain is in violet-blue, RecA2 in purple-blue, WH domain in light pink, Domain 4 of *M. smegmatis* bLhr-HTH in pink and C-terminal domain of *S. coelicolor* Lhr-like in brown. The stereo view of the models was analysed using PyMOL software.

## Supplementary Tables

**Table S1:** (His<sub>6</sub>)-*Paby*-ASH-Ski2 list of protein partners (from the most to the less specific) extracted from [18].

| ID     | ORF     | Name                    | Protein Description                                        | Ref. Spectra | Spec. Index |
|--------|---------|-------------------------|------------------------------------------------------------|--------------|-------------|
| Q9V133 | PAB2412 |                         | Uncharacterized protein                                    | 15.5         | 0           |
| Q9UZ86 | PAB2423 | rgy                     | Reverse gyrase                                             | 14           | 0           |
| Q9UY85 | PAB1284 | DHH-like nuclease       | DHH family                                                 | 9            | 0           |
| Q9UY07 | PAB1115 | Nucleotidyl-transferase | Glucose-1-P thymidyltransferase                            | 8            | 0           |
| G8ZI82 | PAB1751 | 5'-3'exo-ribonuclease   | aRNase J                                                   | 8            | 0           |
| G8ZJS6 | PAB0744 | Lhr2                    | Large helicase-related protein type2                       | 6.5          | 0           |
| Q9V114 | PAB0424 | Rpo1                    | DNA-directed RNA polymerase subunit 1'                     | 6.5          | 0           |
| Q9V113 | PAB0425 | Rpo1''                  | DNA-directed RNA polymerase subunit 1''                    | 4            | 0           |
| Q9UYS8 | PAB1430 | Topo1                   | DNA topoisomerase 1                                        | 3.5          | 0           |
| Q9V1T8 | PAB2122 | L2                      | 50S ribosomal protein L2                                   | 3.5          | 0           |
| Q9V191 | PAB0368 | rps2                    | 30S ribosomal protein S2                                   | 3.5          | 0           |
| P61992 | PAB0361 | S4                      | 30S ribosomal protein S4                                   | 3.           | 0           |
| Q9V0E2 | PAB0569 | Malate dehydratase      | 3-isopropylmalate dehydratase                              | 2.5          | 0           |
| Q9UXX7 | PAB1136 | Rpp30                   | Ribonuclease P protein component 3                         | 2.5          | 0           |
| Q9V181 | PAB1136 | Rpp30                   | Ribonuclease P protein component 3                         | 2.5          | 0           |
| Q9UYS7 | PAB1429 |                         | Uncharacterized protein                                    | 2            | 0           |
| G8ZHR3 | PAB0190 | Hef nuclease            | ERCC4-like helicase                                        | 2            | 0           |
| Q9V116 | PAB7151 | Rpo5                    | RNA polymerase subunit 5/ dsDNA binding                    | 2            | 0           |
| Q9V1U8 | PAB2397 | S4e                     | 30S ribosomal protein S4e                                  | 1.5          | 0           |
| Q9UZL4 | PAB0749 | S8e                     | 30S ribosomal protein S8e                                  | 1.5          | 0           |
| Q9UZP0 | PAB0732 | Rpo4                    | DNA-directed RNA polymerase, subunit 4                     | 1.5          | 0           |
| Q9UZX2 | PAB1688 |                         | Uncharacterized protein                                    | 1.5          | 0           |
| Q9V0H2 | PAB1817 | Lhr1                    | Large helicase-related protein type 1                      | 1.5          | 0           |
| G8ZHS0 | PAB2163 | RPA41                   | Replication factor A (RPA41)                               | 22           | 0.01        |
| Q9V1V6 | PAB2137 | L30                     | 50S ribosomal protein L30P                                 | 4            | 0.02        |
| Q9V0G8 | PAB1813 | S19e                    | 30S ribosomal protein S19e                                 | 2.5          | 0.05        |
| Q9V2M1 | PAB2313 |                         | ATP-dependent RNA helicase                                 | 291.5        | 0.05        |
| Q9V1Z1 | PAB2165 | RPA32                   | Replication factor A (RPA32)                               | 16.          | 0.07        |
| Q9UXS5 | PAB1167 | L10                     | 50S ribosomal protein L10                                  | 1.5          | 0.09        |
| Q9V196 | PAB0365 | L13                     | 50S ribosomal protein L13P                                 | 3.5          | 0.13        |
| Q9V115 | PAB0423 | Rpo2                    | DNA-directed RNA polymerase subunit 2                      | 25           | 0.14        |
| Q9UZN6 | PAB1633 | PINA                    | ATPase                                                     | 4            | 0.14        |
| Q9UZD0 | PAB0810 |                         | Predicted ATPase                                           | 6            | 0.23        |
| Q9V1V5 | PAB2136 | S5                      | 30S ribosomal protein S5                                   | 4.5          | 0.24        |
| Q9V089 | PAB2390 | Sun domain              | Sun protein (Fmu) S-adenosyl methionine/RNA binding domain | 5            | 0.27        |
| Q9V2L4 | PAB2305 | Nop5                    | Component of RNA methylating RNP complex (C/D box)         | 13.5         | 0.29        |
| P62008 | PAB0460 | L7Ae                    | 50S ribosomal / C/D RNP protein L7Ae                       | 3.5          | 0.34        |
| Q9V1U6 | PAB2436 | L14                     | 50S ribosomal protein L14                                  | 2            | 0.35        |
| Q9V1F2 | PAB0316 | DNaG                    | Exosome component cap subunit                              | 11.5         | 0.43        |
| Q9V192 | PAB0367 | Enolase                 | Eno-like enolase related/glycolyse pathway                 | 21           | 0.45        |
| Q9UZ78 | PAB2428 | TmcA                    | tRNA(Met) cytidine acetyltransferase TmcA                  | 35           | 0.58        |
| Q9V1U7 | PAB2128 | L24                     | 50S ribosomal protein L24                                  | 2.5          | 0.71        |
| Q9V2L5 | PAB2306 | Fibrillarin             | rRNA/tRNA 2'-O-methyltransferase                           | 11           | 0.73        |
| Q9V1T5 | PAB2120 | L3                      | 50S ribosomal protein L3                                   | 4.5          | 0.85        |

*Paby*-aLhr2 protein is highlighted in grey. The partners were identified by pulldown-MS/MS as described in [18]. Recombinant ASH-Ski2 protein tagged as its N-terminus was used as bait protein in *P. abyssi* cellular extract. The MS proteomics data are available at the ProteomeXchange Consortium via the PRIDE partner repository "PXD015856". Shortly, the MS data from three replicates were processed in order to identify specific interaction signals. MS data from control samples with no-bait proteins were also generated. Global specific spectra from samples were normalized between replicate series and a cut-off of two normalized spectra as minimum MS signal for network hit validation was used. Normalized spectra were then averaged between replicates and referenced versus control to calculate the number of 'Referenced Spectra'. Calculation of the 'Specificity Index' score is the ratio of the averaged normalized spectra in control versus assay. The 'Specificity Index' varies from 0 to 1 (with a maximum threshold of 1) as the specificity decreases.

**Table S2:** The Lhr and Sfth protein sequence identifiers used in Figures 2 and Supplementary Figure S1, with the related organisms, Uniprot accession numbers and locus-tags of the achaeal Lhr (Excel file Table S2A), bacterial Lhr (Excel file Table S2B) and Sfth (Excel file Table S2C).

**Table S3:** Sequences of synthetic oligonucleotides used in this study.

| Primers | Sequences (5'-3')                                  | Purpose                                                                                                                          |
|---------|----------------------------------------------------|----------------------------------------------------------------------------------------------------------------------------------|
| B15-1   | CATATGTATATCTCCTTCTTAAAGTT                         | Antisense oligo to linearize pET11b and to construct pET11b-aLhr2-Dom4 by inverse PCR from pET11-aLhr2-WT                        |
| B13-18  | GGATCCGGCTGCTAACAAAGCC                             | Sense oligo to linearize pET11b                                                                                                  |
| B18-2   | TTAGCAGCCGGATCCTCATTCAAGCTCCCCGATCA                | Sense oligo to amplify <i>Tbar</i> -aLhr2 from genomic DNA and clone it into pET11b                                              |
| B18-4   | TTAGCAGCCGGATCCTCATTCAAGCTCCCCGATCA                | Antisense oligo to amplify <i>Tbar</i> -aLhr2 from genomic DNA and clone it into pET11b                                          |
| B18-9   | TGGAATTGTACCCGTGTTTCATG                            | Sense oligo to construct pET11-aLhr2-ΔDom4 by inverse PCR from pET11b-aLhr2-WT                                                   |
| B17-33  | [Phosphate]-TAACAAAGCCCGAAAGGAAGCT                 | Antisense oligo to construct pET11b-aLhr2-ΔDom4 by inverse PCR from pET11-aLhr2-WT                                               |
| B18-10  | [Phosphate]-GATGAGGCTAAAATCGAAGTTTA                | Sense oligo to construct pET11b-aLhr2-Dom4 by inverse PCR from pET11-aLhr2-WT                                                    |
| B19-04  | GATCCCAGCGGCGTTTTCTGAAATGTTGCCT                    | Sense oligo to introduce the W577A mutation in pET11b-aLhr2 by directed mutagenesis                                              |
| B19-05  | TTCAGAAAACGCCGCTGGGATCGTTGGCTT                     | Antisense oligo to introduce the W577A mutation in pET11b-aLhr2 by directed mutagenesis                                          |
| B19-06  | AACACGGGTACAGCTCCAGATGAGGCTAAA                     | Sense oligo to introduce the I512A mutation in pET11b-aLhr2 by directed mutagenesis                                              |
| B19-07  | ATCTGGAGCTGTACCCGTGTTTCATGTAGTA                    | Antisense oligo to introduce the I512A mutation in pET11b-aLhr2 by directed mutagenesis                                          |
| B19-22  | AACCTCTTCGAGGGGATGAATAGCGGCACT                     | Sense oligo to introduce the T215A mutation in pET11b-aLhr2 by directed mutagenesis                                              |
| B19-20  | TTCGTTAGAATCGGTCTCAGTGCCGCTATTC                    | Antisense oligo to introduce the T215A mutation in pET11b-aLhr2 by directed mutagenesis                                          |
| B15-37  | CCGGAATTCTAATACGACTCACTATAGATCGATAGTCTCTAGACAGCATG | Sense oligo to assemble T7-RNA <sub>50</sub> PCR product that is used for <i>in vitro</i> transcription of RNA <sub>50</sub>     |
| B15-38  | ACGCTGCCGAATTCTGGCTTGCTAGGACATGCTGTCTAGAGACTATCG   | Antisense oligo to assemble T7-RNA <sub>50</sub> PCR product that is used for <i>in vitro</i> transcription of RNA <sub>50</sub> |

**Table S4 :** Nucleotide sequences of the single-stranded and duplex DNA and RNA substrates used in this study.

| DNA & RNA substrates                   |                                                                                                      |
|----------------------------------------|------------------------------------------------------------------------------------------------------|
| DNA <sub>50</sub>                      | 5' ATCGATAGTCTCTAGACAGCATGTCCTAGCAAGCCAGAATTCGGCAGCGT                                                |
| RNA <sub>50</sub>                      | 5' AUCGAUAGUCUCUAGACAGCAUGUCCUAGCAAGCCAGAAUUCGGCAGCGU                                                |
| DNA <sub>59</sub>                      | 5' GACGCTGCCGAATTCTACCAAGTGCCTTGCTAGGACATCTTTGCCACCTGCAGGTTTAC                                       |
| DNA <sub>26</sub>                      | 5' TAGCTATCAGAGATCTGTCTGTACAGG                                                                       |
| RNA <sub>26</sub>                      | 5' ACGCUGCCGAAUUCUGGCUUGCUAGG                                                                        |
| DNA <sub>31</sub>                      | 5' CTGCGACGGCTTAAGATGGTCACGGAACGAT                                                                   |
| 5'DNA <sub>59</sub> :DNA <sub>31</sub> | 5' GACGCTGCCGAATTCTACCAAGTGCCTTGCTAGGACATCTTTGCCACCTGCAGGTTTAC<br>CTGCGACGGCTTAAGATGGTCACGGAACGAT 5' |
| 3'DNA <sub>50</sub> :RNA <sub>26</sub> | 5' ATCGATAGTCTCTAGACAGCATGTCCTAGCAAGCCAGAATTCGGCAGCGT<br>UAGCUAUCAGAGAUCUGUCGUACAGG 5'               |
| 3'RNA <sub>50</sub> :RNA <sub>26</sub> | 5' AUCGAUAGUCUCUAGACAGCAUGUCCUAGCAAGCCAGAAUUCGGCAGCGU<br>UAGCUAUCAGAGAUCUGUCGUACAGG 5'               |
| 5'RNA <sub>50</sub> :RNA <sub>26</sub> | 5' AUCGAUAGUCUCUAGACAGCAUGUCCUAGCAAGCCAGAAUUCGGCAGCGU<br>GGAUCGUUCGGUCUUAAGCCGUCGCA 5'               |
