# Supplementary figures and images for: Phylogenetic Diversity of Lhr Proteins and Biochemical Activities of the Thermococcales aLhr2 DNA/RNA Helicase
Source: MDPI journal article supplement (doi:10.3390/biom11070950), 2021-06-26

Figure S2

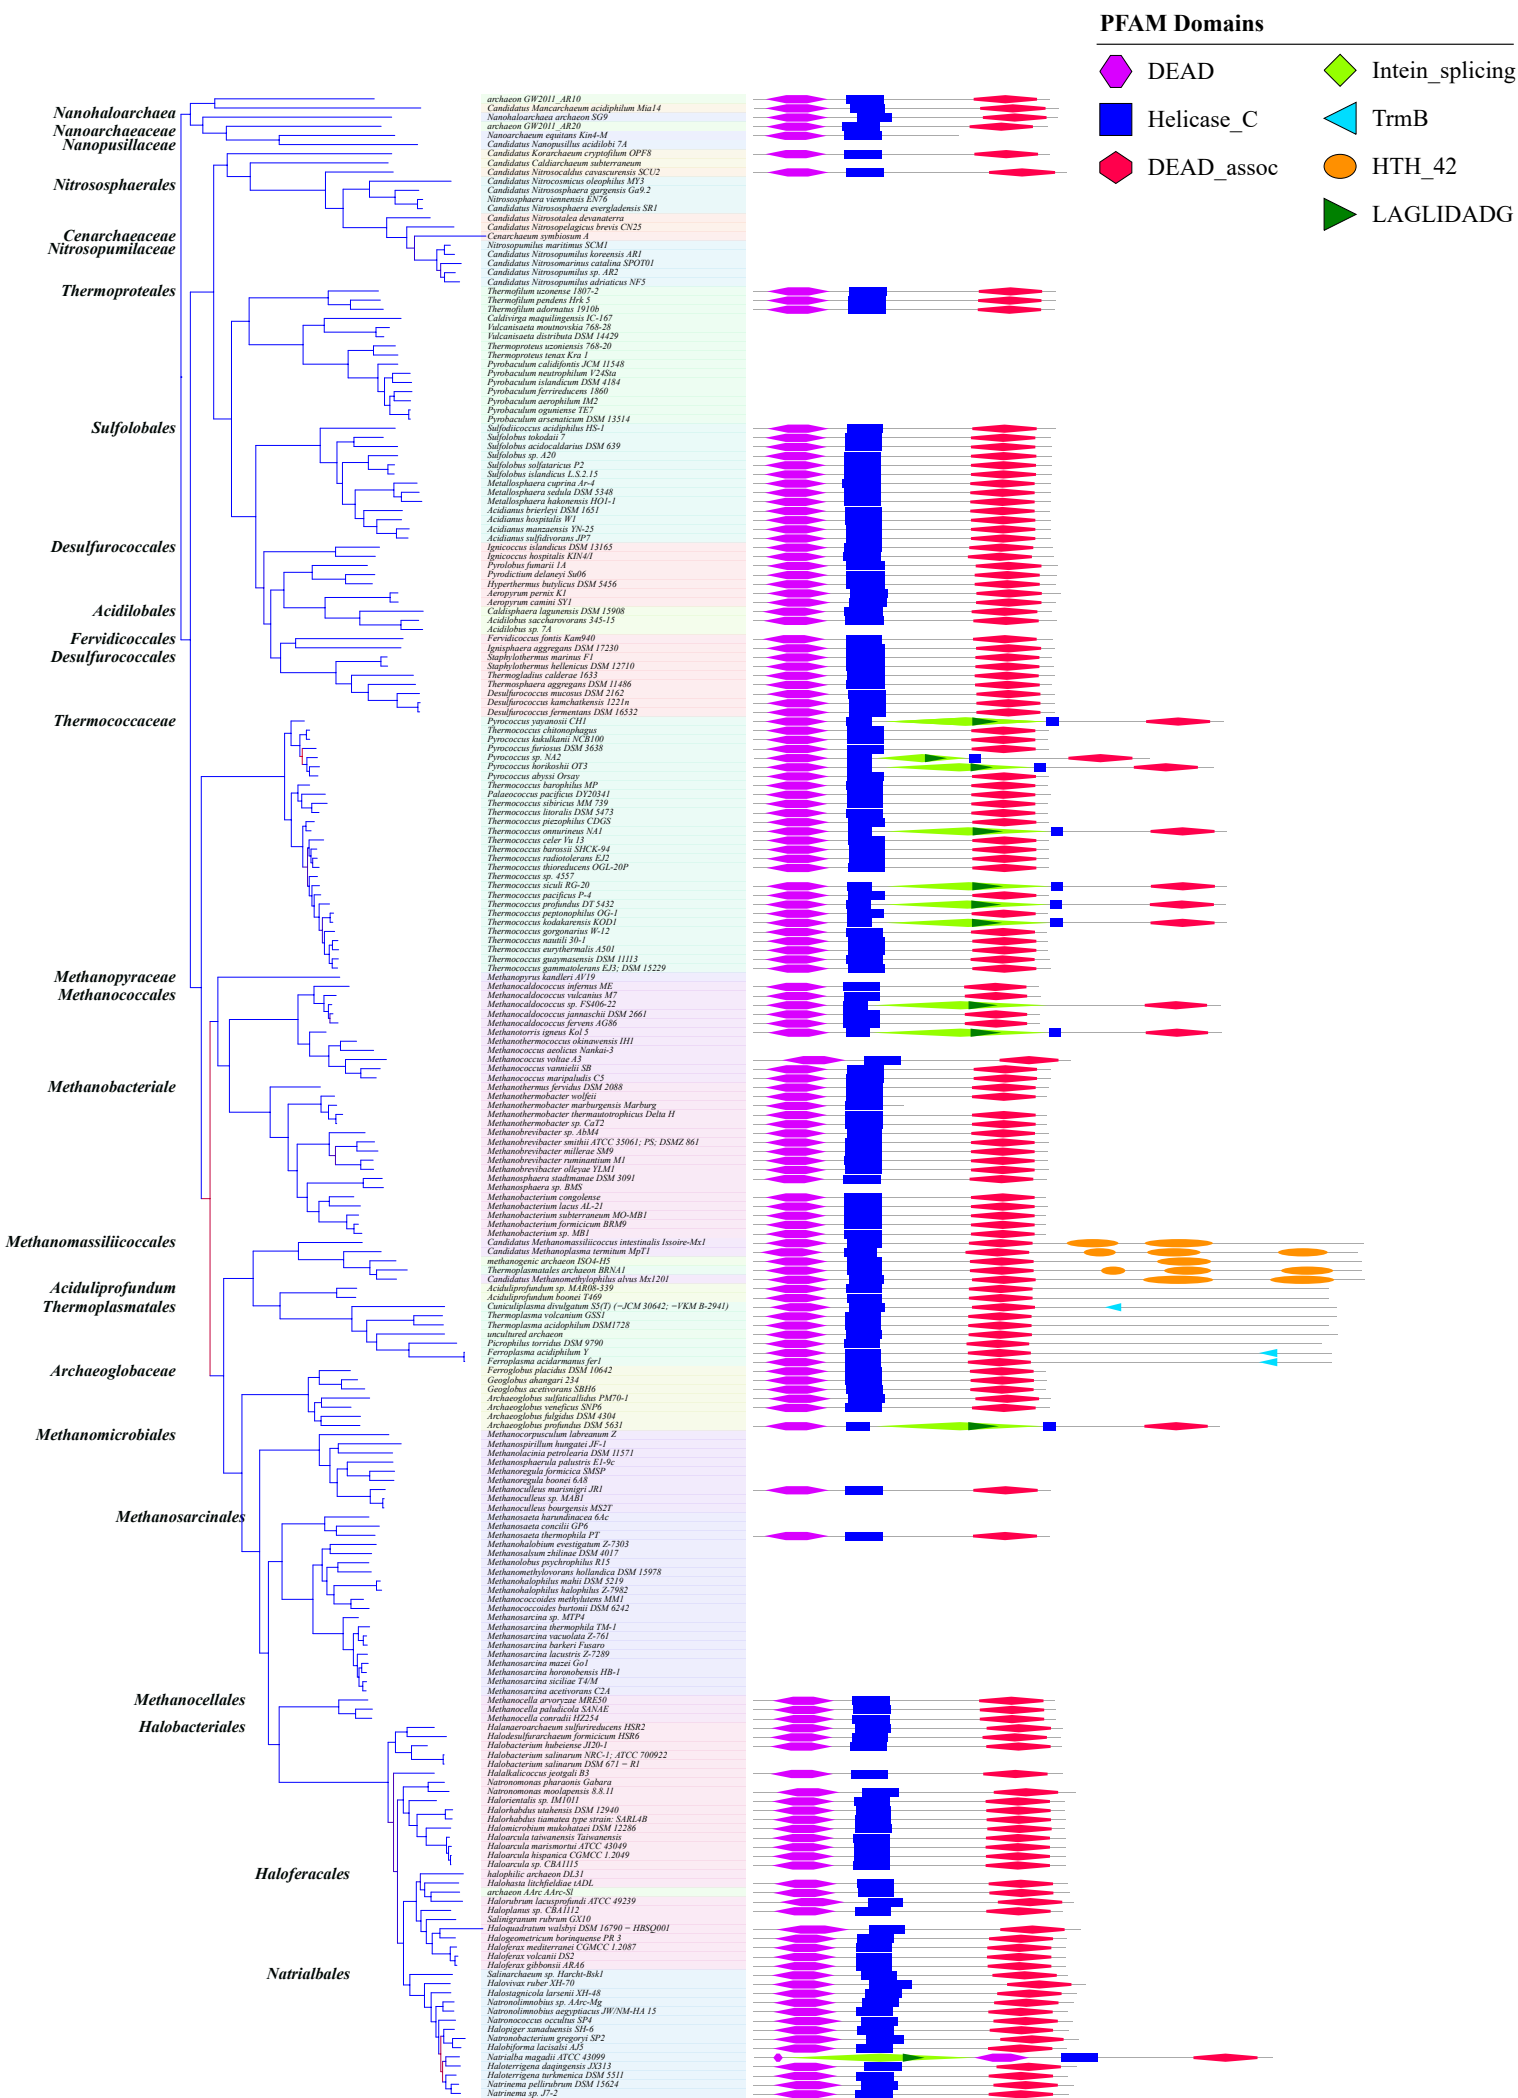

Supplement: s1 [file s1]

Figure S4

A.

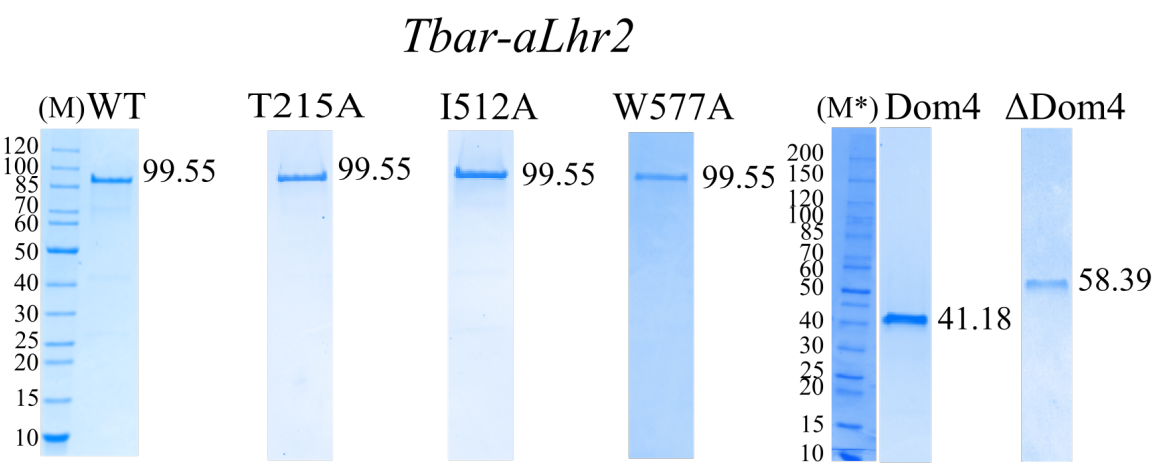

B.

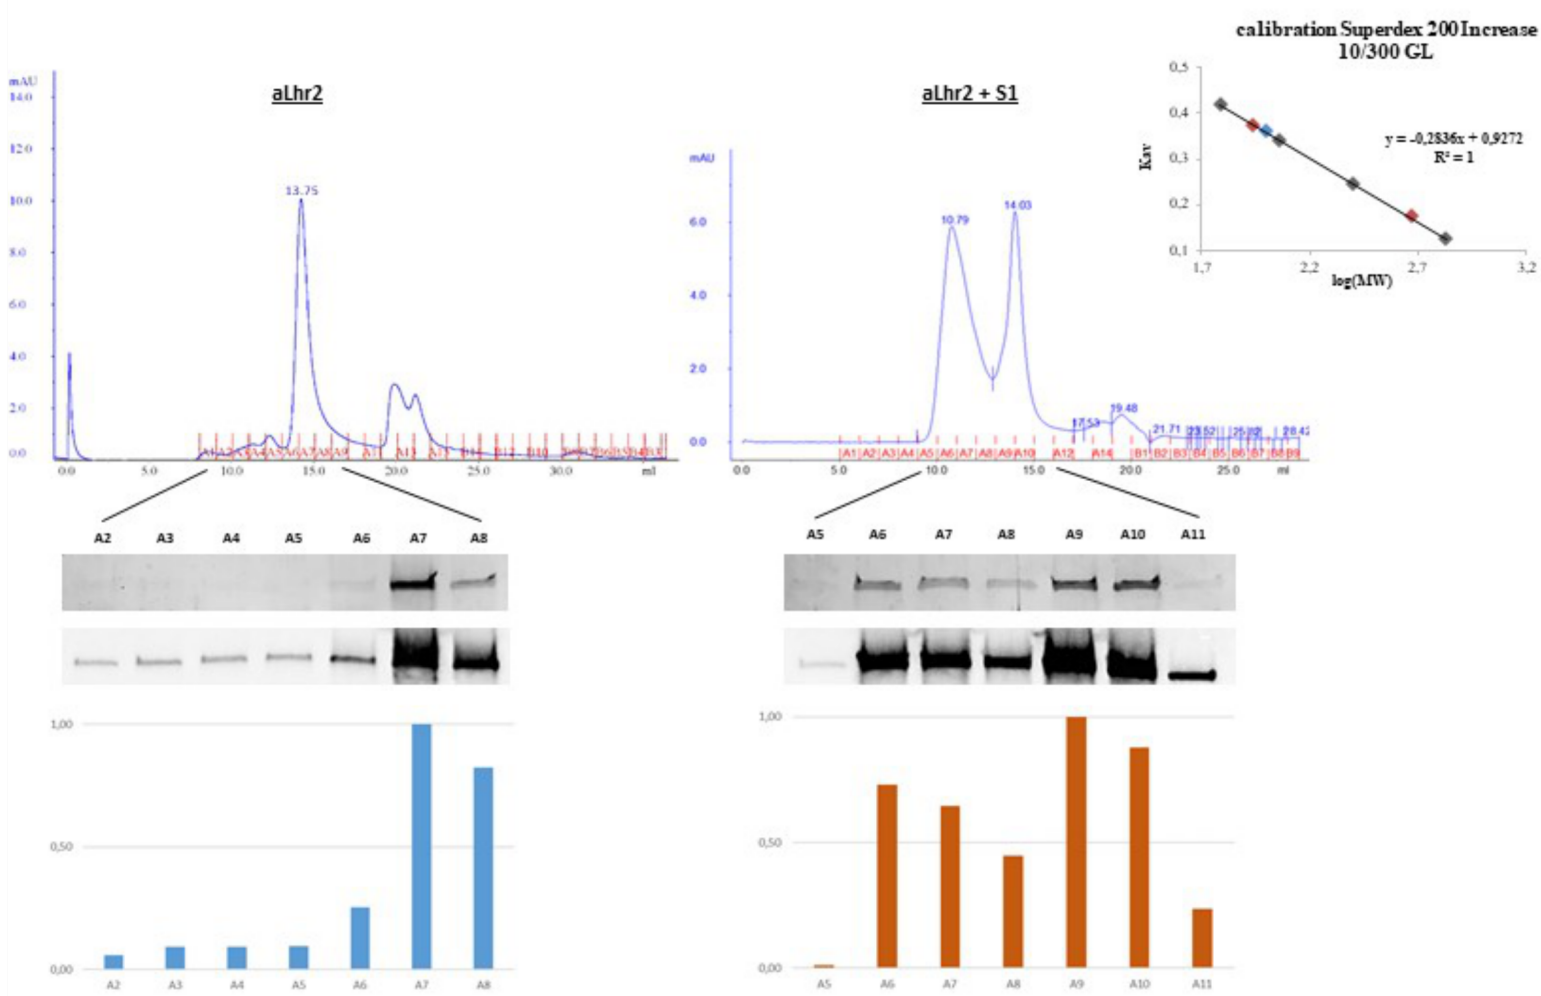

Supplement: s1 [file s1]

Figure S5

A.

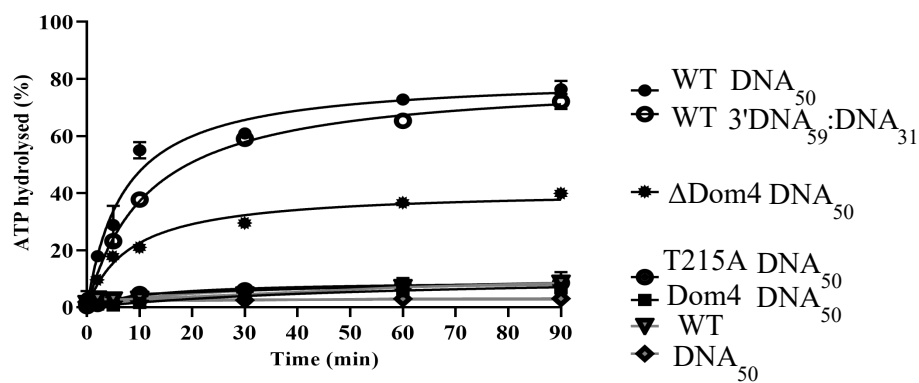

B.

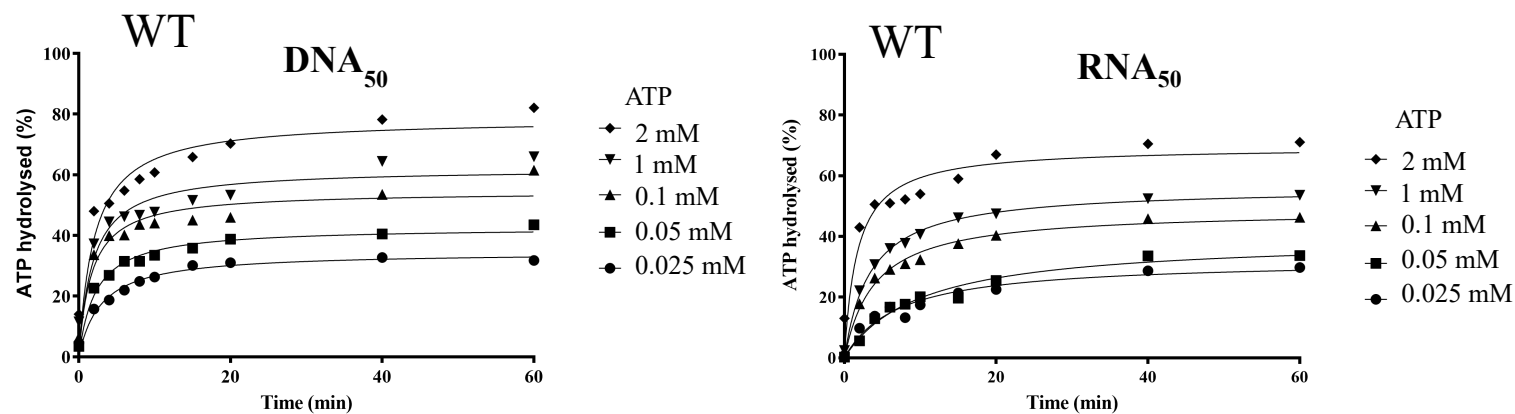

C.

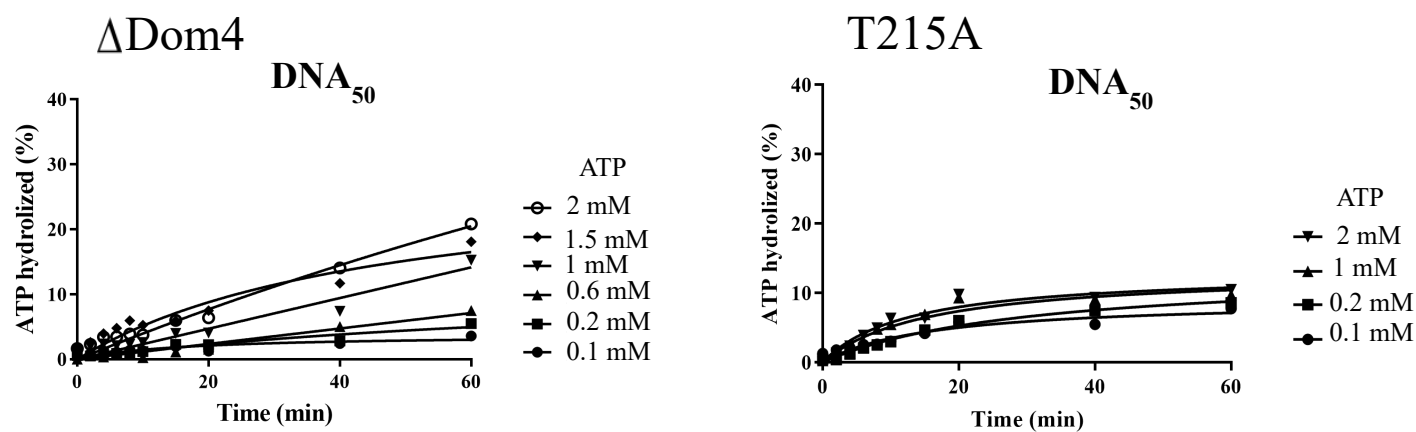

Supplement: s1 [file s1]

Figure S1

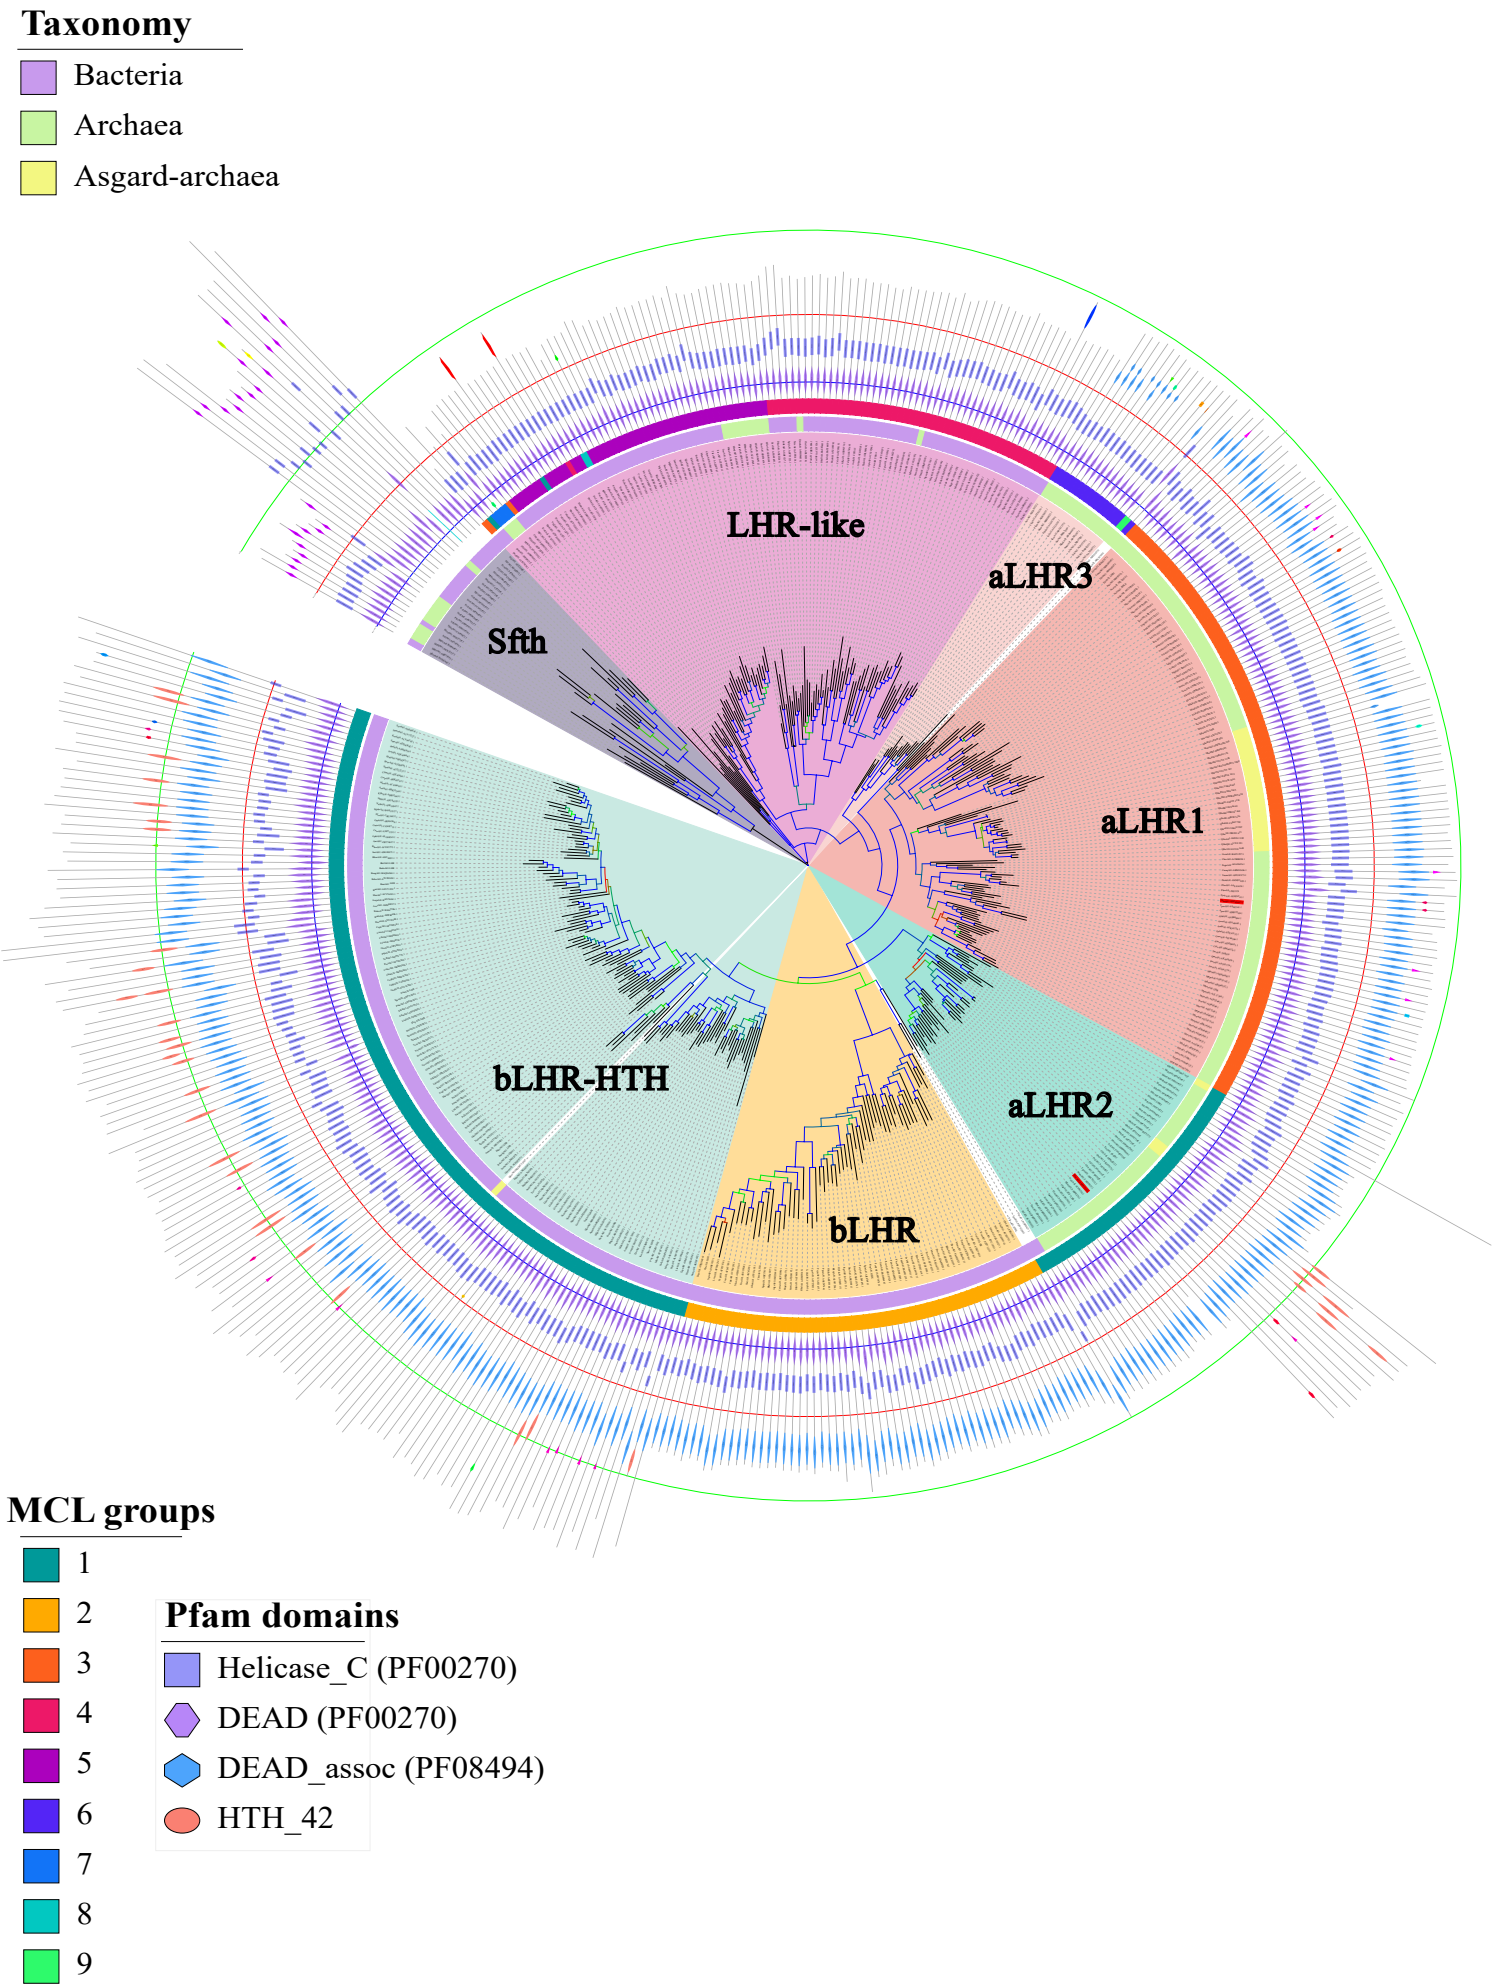

Supplement: s1 [file s1]

Figure S3

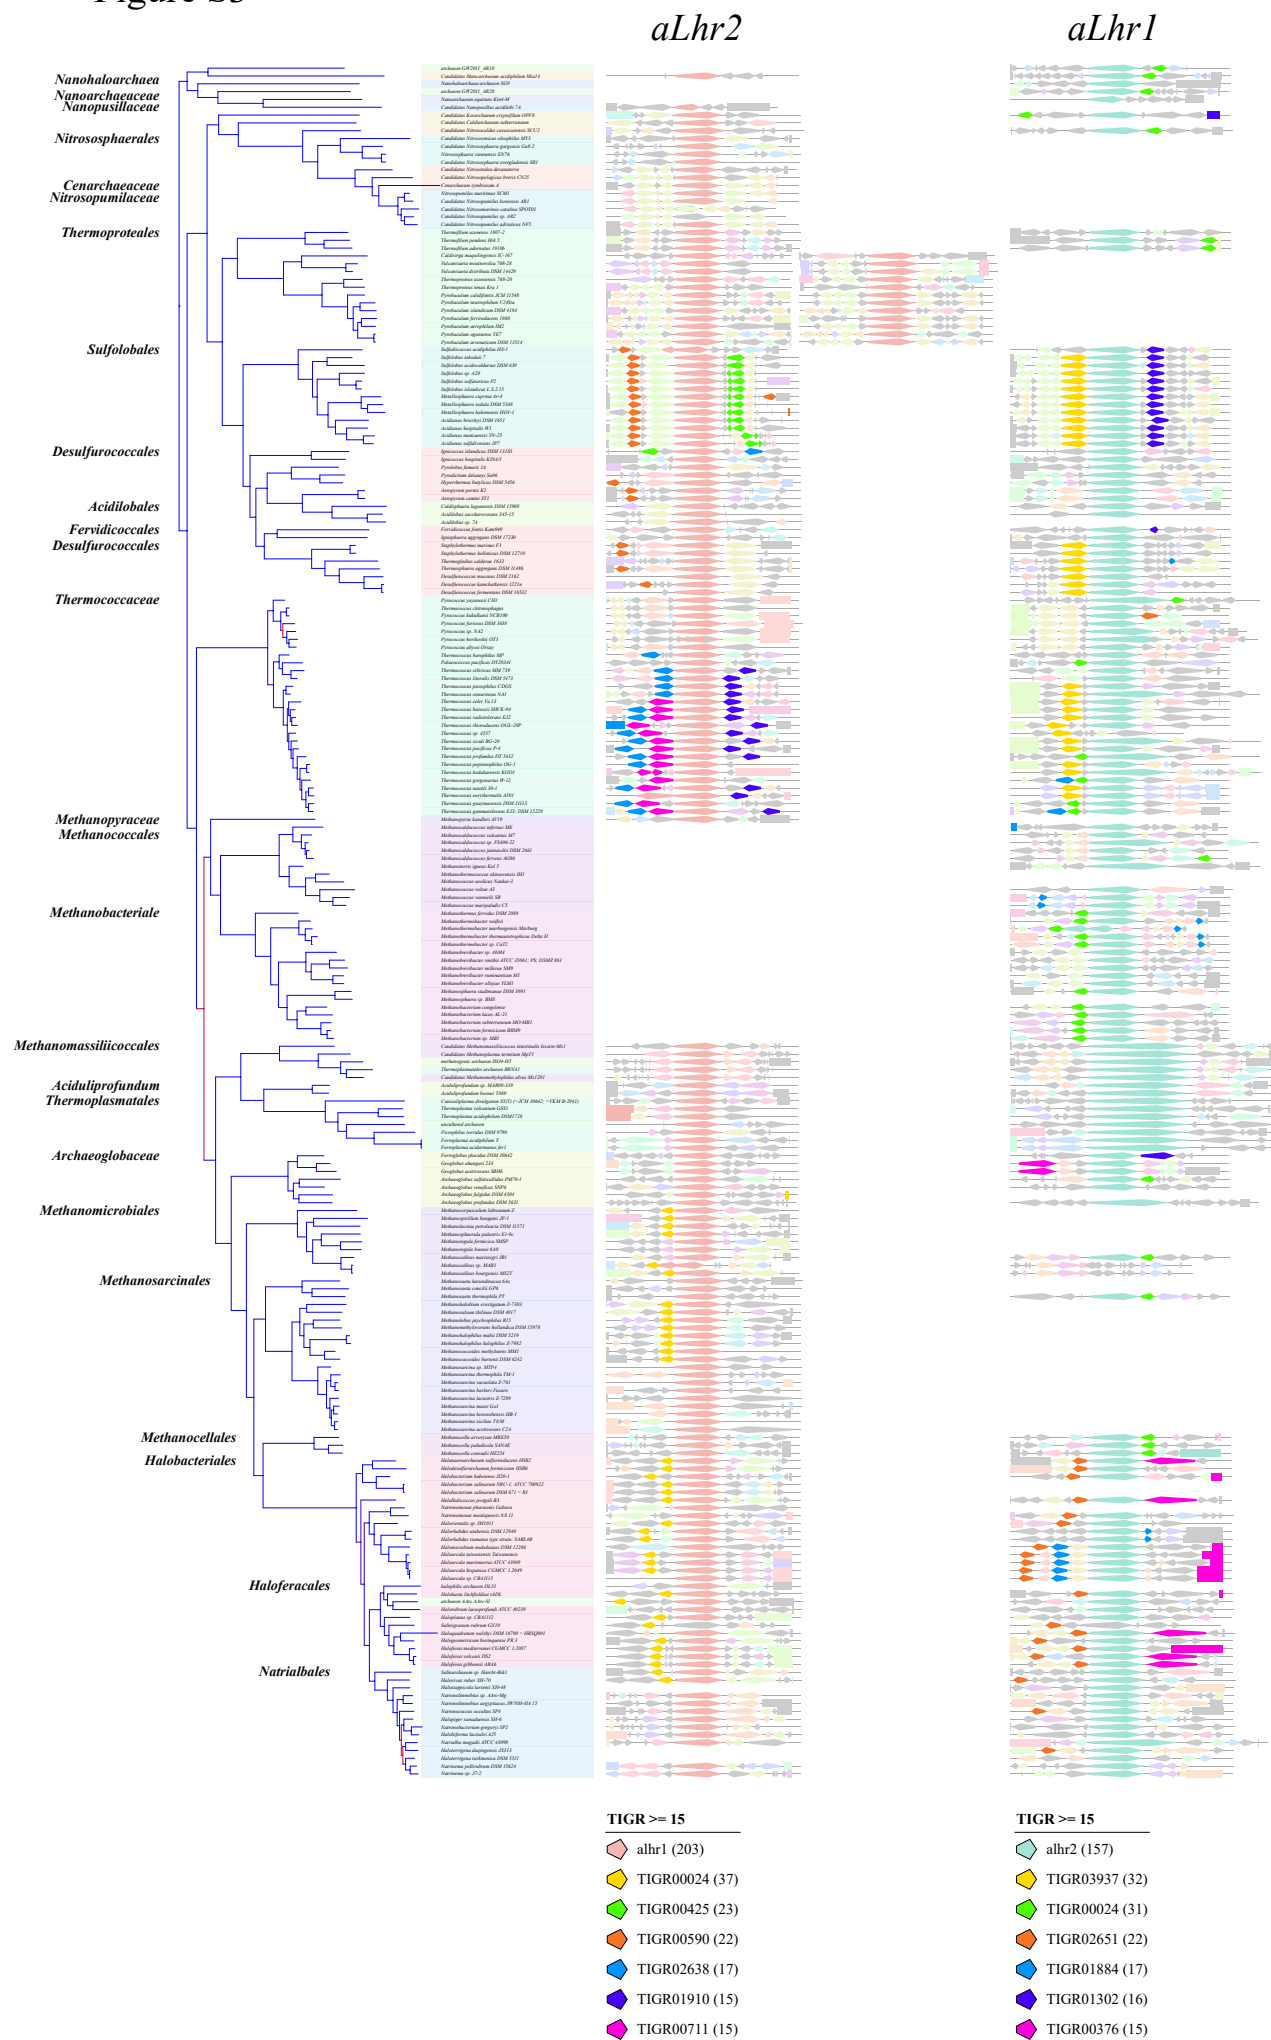

Supplement: s1 [file s1]

Figure S6

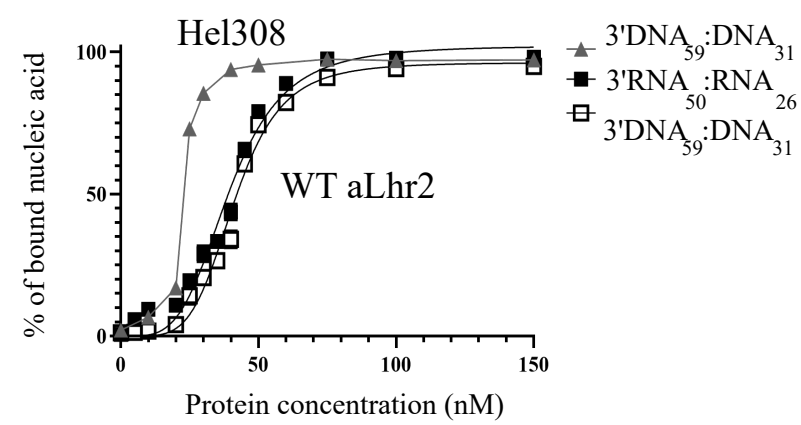

Supplement: s1 [file s1]

Figure S9

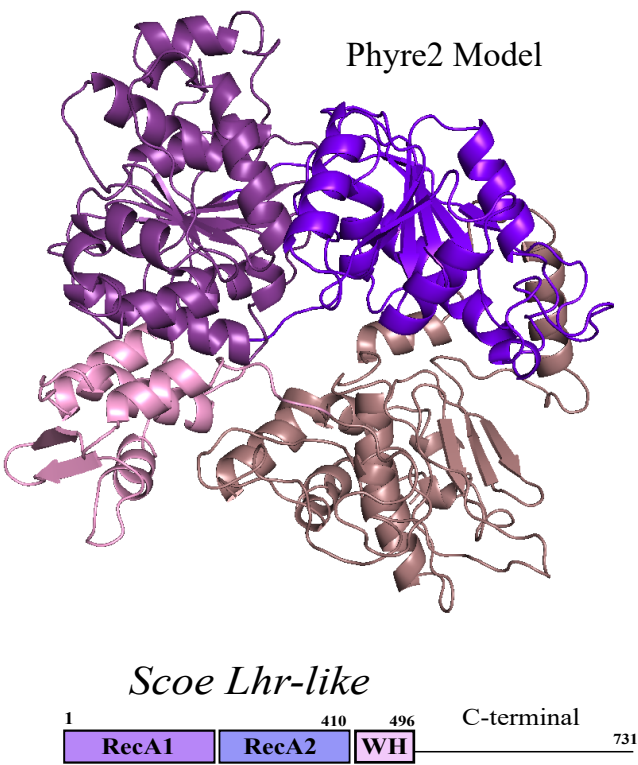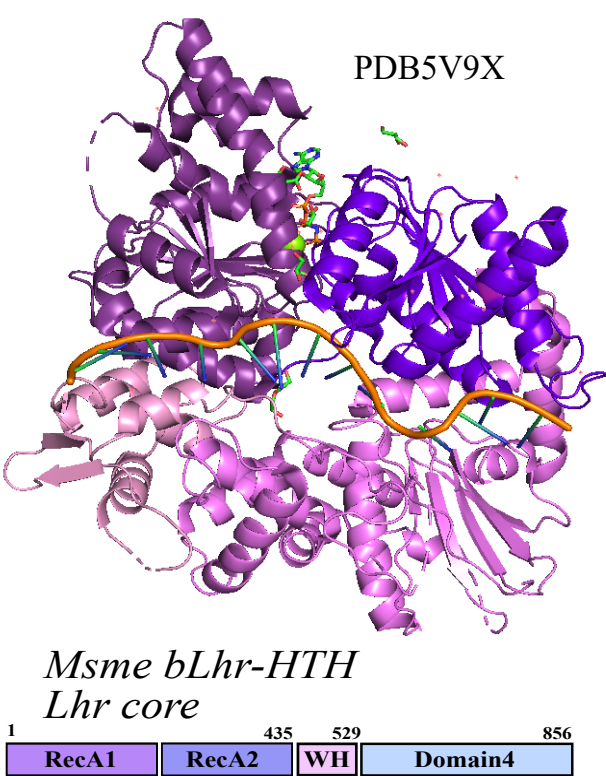

Supplement: s1 [file s1]

Figure S7

A.

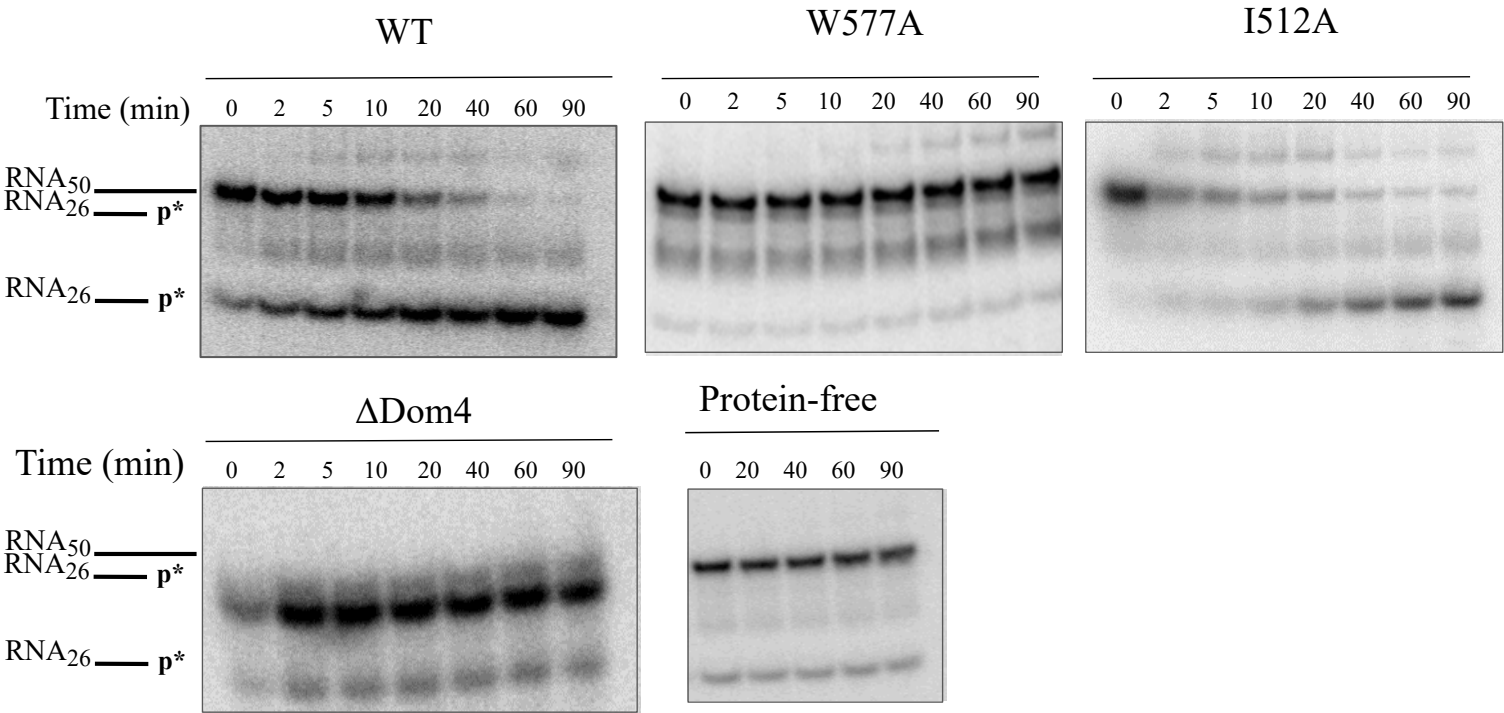

B.

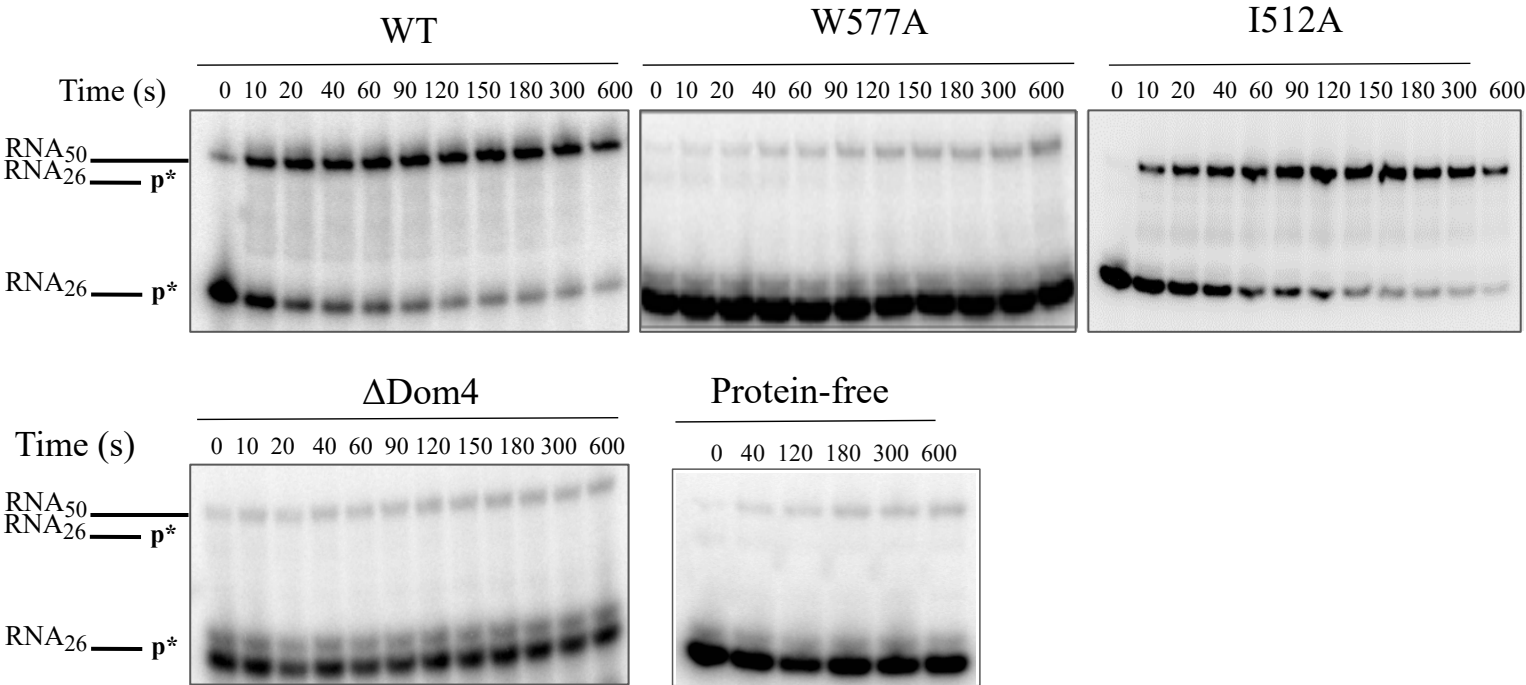

Supplement: s1 [file s1]

Figure S8

A.

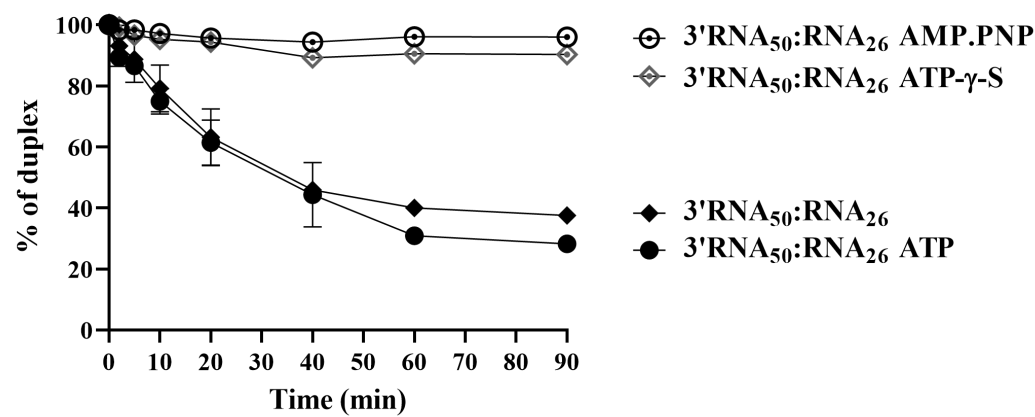

B.

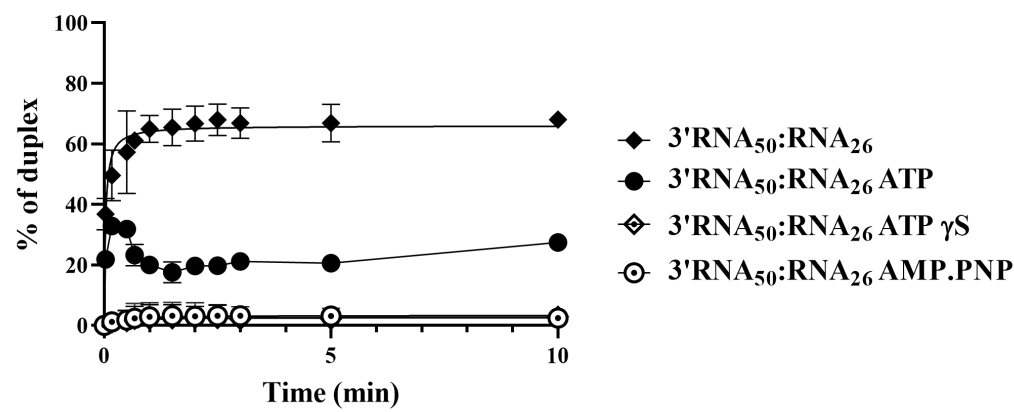

Supplement: s1 [file s1]
